# Supplementary material for: The Effect of Stress Hormones, Ultraviolet C, and Stilbene Precursors on Expression of Calcineurin B-like Protein (CBL) and CBL-Interacting Protein Kinase (CIPK) Genes in Cell Cultures and Leaves of Vitis amurensis Rupr
Source: MDPI journal article supplement (doi:10.3390/plants12071562), 2023-04-05
Supplement: s1 [file s1]

**Table S1.** Individual stilbene content (mg/g of dry weight, DW) in the *Vitis amurensis* cell culture V7 and leaves in control conditions (V7, L) and after salicylic acid (SA 50, SA 200  $\mu$ M), methyl jasmonate acid (MeJa 50, MeJa 200  $\mu$ M), *p*-coumaric acids acid (CA 100, CA 500  $\mu$ M) feeding and after ultraviolet C treatment (UV-C 1 h, UV-C 24 h).

\* –  $p < 0.05$ ; \*\* –  $p < 0.01$  versus values of total stilbene levels in the V7 cell line (V7, for cell culture samples) or in grape leaves (L, for leaf samples) cultivated in control conditions.

| Treatments               | (1) <sup>a</sup> <i>t</i> -resveratrol diglucoside, mg/g DW | (2) <i>t</i> -piceid, mg/g DW     | (3) <i>cis</i> -piceid, mg/g DW   | (4) <i>t</i> -piceatannol, mg/g DW | (5) <i>t</i> -resveratrol, mg/g DW | (6) <i>cis</i> -resveratrol, mg/g DW | (7) $\epsilon$ -viniferin, mg/g DW | (8) $\delta$ -viniferin, mg/g DW  |
|--------------------------|-------------------------------------------------------------|-----------------------------------|-----------------------------------|------------------------------------|------------------------------------|--------------------------------------|------------------------------------|-----------------------------------|
| V7                       | <b>0.23 <math>\pm</math> 0.05</b>                           | <b>0.04 <math>\pm</math> 0.01</b> | <b>0.01 <math>\pm</math> 0.01</b> | <b>0</b>                           | <b>0.03 <math>\pm</math> 0.02</b>  | <b>0</b>                             | <b>0.01 <math>\pm</math> 0.01</b>  | <b>0.05 <math>\pm</math> 0.02</b> |
| V7 with CA 100 $\mu$ M   | 0.68 $\pm$ 0.18*                                            | 0.13 $\pm$ 0.03*                  | 0.02 $\pm$ 0.01                   | 0.01 $\pm$ 0.01                    | 0.14 $\pm$ 0.04*                   | 0.01 $\pm$ 0.01                      | 0.10 $\pm$ 0.04*                   | 0.27 $\pm$ 0.08*                  |
| V7 with CA 500 $\mu$ M   | 0.75 $\pm$ 0.04**                                           | 0.14 $\pm$ 0.03*                  | 0.01 $\pm$ 0.01                   | 0.01 $\pm$ 0.01                    | 0.21 $\pm$ 0.06**                  | 0                                    | 0.09 $\pm$ 0.03*                   | 0.24 $\pm$ 0.05*                  |
| V7 with MeJa 50 $\mu$ M  | 0.72 $\pm$ 0.12**                                           | 0.25 $\pm$ 0.11*                  | 0.01 $\pm$ 0.01                   | 0                                  | 0.12 $\pm$ 0.03*                   | 0                                    | 0.05 $\pm$ 0.02                    | 0.14 $\pm$ 0.04                   |
| V7 with MeJa 200 $\mu$ M | 1.19 $\pm$ 0.21**                                           | 0.13 $\pm$ 0.02*                  | 0.01 $\pm$ 0.01                   | 0.01 $\pm$ 0.01                    | 0.09 $\pm$ 0.03                    | 0.01 $\pm$ 0.01                      | 0.35 $\pm$ 0.20*                   | 0.60 $\pm$ 0.32**                 |
| V7 with SA 50 $\mu$ M    | 0.73 $\pm$ 0.10**                                           | 0.10 $\pm$ 0.03                   | 0                                 | 0                                  | 0.24 $\pm$ 0.10**                  | 0                                    | 0.06 $\pm$ 0.02                    | 0.18 $\pm$ 0.05*                  |
| V7 with SA 200 $\mu$ M   | 0.77 $\pm$ 0.08**                                           | 0.11 $\pm$ 0.04                   | 0                                 | 0.01 $\pm$ 0.01                    | 0.14 $\pm$ 0.02*                   | 0                                    | 0.09 $\pm$ 0.02*                   | 0.19 $\pm$ 0.05*                  |
| V7 after 1 h of UV-C     | 0.69 $\pm$ 0.18**                                           | 0.09 $\pm$ 0.04                   | 0.01 $\pm$ 0.01                   | 0.01 $\pm$ 0.01                    | 0.14 $\pm$ 0.05*                   | 0.01 $\pm$ 0.01                      | 0.11 $\pm$ 0.02*                   | 0.26 $\pm$ 0.06*                  |
| V7 after 24 h of UV-C    | 1.31 $\pm$ 0.45**                                           | 0.10 $\pm$ 0.03                   | 0.03 $\pm$ 0.01                   | 0.01 $\pm$ 0.01                    | 0.15 $\pm$ 0.06*                   | 0.02 $\pm$ 0.01                      | 0.52 $\pm$ 0.25**                  | 1.18 $\pm$ 0.41**                 |
| L                        | <b>0</b>                                                    | <b>0.04 <math>\pm</math> 0.02</b> | <b>0</b>                          | <b>0</b>                           | <b>0.01 <math>\pm</math> 0.01</b>  | <b>0</b>                             | <b>0.01 <math>\pm</math> 0.01</b>  | <b>0.01 <math>\pm</math> 0.01</b> |
| L with CA 100 $\mu$ M    | 0                                                           | 0.16 $\pm$ 0.08*                  | 0.08 $\pm$ 0.05*                  | 0.01 $\pm$ 0.01                    | 0.06 $\pm$ 0.03*                   | 0                                    | 0.01 $\pm$ 0.01                    | 0.01 $\pm$ 0.01                   |
| L with CA 500 $\mu$ M    | 0                                                           | 0.10 $\pm$ 0.08                   | 0.04 $\pm$ 0.03                   | 0.02 $\pm$ 0.01                    | 0.01 $\pm$ 0.01                    | 0                                    | 0.01 $\pm$ 0.01                    | 0.01 $\pm$ 0.01                   |
| L with MeJa 50 $\mu$ M   | 0                                                           | 0.06 $\pm$ 0.02                   | 0.01 $\pm$ 0.01                   | 0.01 $\pm$ 0.01                    | 0.05 $\pm$ 0.02*                   | 0.01 $\pm$ 0.01                      | 0.01 $\pm$ 0.01                    | 0.01 $\pm$ 0.01                   |
| L with MeJa 200 $\mu$ M  | 0                                                           | 0.14 $\pm$ 0.05*                  | 0                                 | 0.02 $\pm$ 0.01                    | 0.02 $\pm$ 0.01                    | 0.01 $\pm$ 0.01                      | 0.01 $\pm$ 0.01                    | 0.01 $\pm$ 0.01                   |
| L with SA 50 $\mu$ M     | 0                                                           | 0.09 $\pm$ 0.06                   | 0.01 $\pm$ 0.01                   | 0.01 $\pm$ 0.01                    | 0.02 $\pm$ 0.01                    | 0.01 $\pm$ 0.01                      | 0.01 $\pm$ 0.01                    | 0.01 $\pm$ 0.01                   |
| L with SA 200 $\mu$ M    | 0                                                           | 0.10 $\pm$ 0.05                   | 0.03 $\pm$ 0.02                   | 0                                  | 0.12 $\pm$ 0.06**                  | 0.01 $\pm$ 0.01                      | 0.01 $\pm$ 0.01                    | 0.01 $\pm$ 0.01                   |
| L after 1 h of UV-C      | 0                                                           | 0.09 $\pm$ 0.05                   | 0.01 $\pm$ 0.01                   | 0.01 $\pm$ 0.01                    | 0.07 $\pm$ 0.02*                   | 0.05 $\pm$ 0.02*                     | 0.04 $\pm$ 0.03                    | 0.01 $\pm$ 0.01                   |
| L after 24 h of UV-C     | 0                                                           | 0.14 $\pm$ 0.04*                  | 0.01 $\pm$ 0.01                   | 0.01 $\pm$ 0.01                    | 0.08 $\pm$ 0.02*                   | 0.09 $\pm$ 0.02*                     | 0.04 $\pm$ 0.02                    | 0.01 $\pm$ 0.01                   |

<sup>a</sup> - the numbers of stilbene compounds in parentheses correspond to the numbers of stilbenes presented on the HPLC chromatogram (Figure 1).

**Table S2.** Individual calcineurin B-like proteins (*CBL*) and CBL-interacting protein kinases (*CIPK*) genes and their known transcripts in grapevine (Xi et al. 2017).

| Gene name            | Gene transcript name | Gene ID*             | Primers for qPCR                                       |  |
|----------------------|----------------------|----------------------|--------------------------------------------------------|--|
| <b><i>CBL4</i></b>   | <i>CBL4-1</i>        | VIT_216s0098g01870.1 | 5'TGAAGGAGATGGTGCTGGC<br>5'GTTGAAGACTCAGAAATATAG       |  |
|                      | <i>CBL4-2</i>        | VIT_216s0098g01870.8 | 5'TGAAGGAGATGGTGCTGGC<br>5'GTATCAAAGAATCCATCCCTGA      |  |
| <b><i>CBL5</i></b>   | <i>CBL5</i>          | VIT_202s0025g01630   | 5'GGAGATGGAAAGATTGATCC<br>5'GAGATCAGACCCTGAAGATTAA     |  |
| <b><i>CBL8</i></b>   | <i>CBL8</i>          | VIT_202s0025g01640   | 5'GTAGCCCGGAATCCATCAAT<br>5'GATTGAGATATTGTAGCTAA       |  |
| <b><i>CBL10a</i></b> | <i>CBL10a-1</i>      | VIT_204s0008g00950.1 | 5'ATTTATCGAGCGCGAGGAAGT<br>5'CAATACTGAGGTTGAAGAATGA    |  |
|                      | <i>CBL10a-2</i>      | VIT_204s0008g00950.2 | 5'ATTTATCGAGCGCGAGGAAGT<br>5'TGACTCTTCCTTATTGAAGTAA    |  |
|                      | <i>CBL10a-3</i>      | VIT_204s0008g00950.3 | 5'ATTTATCGAGCGCGAGGAAGT<br>5'TGACAAGGTGTTGTTTAAATTATAA |  |
|                      | <i>CBL10a-4</i>      | VIT_204s0008g00950.4 | 5'ATTTATCGAGCGCGAGGAAGT<br>5'TCGGTTGTTGCCAAAACTAG      |  |
| <b><i>CBL10b</i></b> | <i>CBL10b-1</i>      | VIT_204s0008g00960.1 | 5'ATGAACTCTACGGAGAGTTC<br>5'AGTATTCACCGCACCCACC        |  |
| <b><i>CBL11</i></b>  | <i>CBL11</i>         | VIT_219s0015g01070   | 5'CTACGACACCCATCCCTTTTG<br>5'CTCAAGTTGACGACACCTGA      |  |
| <b><i>CBL12</i></b>  | <i>CBL12</i>         | VIT_200s1569g00020   | 5'CATCACCACCTACATTCCCAAGT<br>5'CTCACAAGTGGATGACACTTGA  |  |
| <b><i>CBL13</i></b>  | <i>CBL13-1,2</i>     | VIT_202s0236g00140.1 | 5'GACGTAAATCAGGATGGGAG<br>5'GTGGATGAGATTGCTACATAA      |  |
|                      | <i>CBL13-3</i>       | VIT_202s0236g00140.3 | 5'GACGTAAATCAGGATGGGAG<br>5'GCTTTTTTTGACAGTTGAGTAA     |  |
| <b><i>CIPK3</i></b>  | <i>CIPK3</i>         | VIT_206s0009g01840   | 5'GGAACTGCTATGCCTTTGGGG<br>5'GTCTGGTGTGGCATCAACTGA     |  |
| <b><i>CIPK9</i></b>  | <i>CIPK9-1</i>       | VIT_215s0048g02740.3 | 5'TGTCTAAAATTGAGGAACTGCA<br>5'TACTGAAGAATTGAGGT        |  |
|                      | <i>CIPK9-1</i>       | VIT_215s0048g02740.4 | 5'TGTCTAAAATTGAGGAACTGCA<br>5'GGAGTTCCACAAGGCATGCTAA   |  |
| <b><i>CIPK12</i></b> | <i>CIPK12</i>        | VIT_210s0003g01420   | 5'CCCGTGTTGCAGAACCTTG<br>5'TTTGCCCTCAGATACTGAATAG      |  |

|               |                 |                      |                                                       |  |
|---------------|-----------------|----------------------|-------------------------------------------------------|--|
| <i>CIPK21</i> | <i>CIPK21-1</i> | VIT_211s0052g01700.2 | 5'AGGTGGCTCCCACTCATTGT<br>5'CAATGGCTATTCTTCCTCTTGA    |  |
|               | <i>CIPK21-2</i> | VIT_211s0052g01700.3 | 5'AGGTGGCTCCCACTCATTGT<br>5'ATATTCAGGAAACTGAATGGTAA   |  |
| <i>CIPK24</i> | <i>CIPK24</i>   | VIT_211s0016g05420   | 5'GAGGTTTTTTGAAGTTGCACCAT<br>5'CTAAGAACAATGACTTGCTGA  |  |
| <i>CIPK27</i> | <i>CIPK27</i>   | VIT_208s0058g01090   | 5'CGCCTTGATAATGGAGATATATC<br>5'GAGCCGAGCACCGAGAGCTGA  |  |
| <i>CIPK28</i> | <i>CIPK28</i>   | VIT_206s0004g07870   | 5'GACCAAATGGTAATTCATAATCG<br>5'ACCCAAGTCGCCGGCGATTAA  |  |
| <i>CIPK29</i> | <i>CIPK29</i>   | VIT_205s0020g04570   | 5'CTGTTGGTTCGAAGTTTCAGAAG<br>5'TGGGAGGGTAGTGGGATGTAG  |  |
| <i>CIPK30</i> | <i>CIPK30</i>   | VIT_209s0070g00160   | 5'GCGACGTGGTATTGAAGCTA<br>5'CCAAAATTCGGCAGTTGCTTGA    |  |
| <i>CIPK31</i> | <i>CIPK31</i>   | VIT_211s0016g00200   | 5'GGGAAATTAGCGATAGGAGC<br>5'TGGACGTCCACCCAGCCTGA      |  |
| <i>CIPK32</i> | <i>CIPK32</i>   | VIT_204s0008g05770   | 5'GGCCGGAAAGGGAGGTTAT<br>5'ATATTGTTGAATGTGAAAATTAA    |  |
| <i>CIPK33</i> | <i>CIPK33</i>   | VIT_209s0070g00140   | 5'CTGGAGTACACCAAGTTTTGTG<br>5'TATGACATGTGAGGAATGGTAG  |  |
| <i>CIPK34</i> | <i>CIPK34</i>   | VIT_208s0058g01040   | 5'GTGAAGAAGTCCAGTGGGGA<br>5'CATCTCACCTCCAGCTTCATAA    |  |
| <i>CIPK35</i> | <i>CIPK35</i>   | VIT_216s0022g00350   | 5'GGTTATGGCCAGCAAAATGAAG<br>5'AGGTGTTTATCATCGGGATTGA  |  |
| <i>CIPK36</i> | <i>CIPK36</i>   | VIT_210s0003g01410   | 5'GGTTAAGAAAAAGGATGGGACG<br>5'GCAACAGCCACAACCACAATAG  |  |
| <i>CIPK37</i> | <i>CIPK37</i>   | VIT_213s0067g02480   | 5'GGAAATGAAGAAGTCCAGTGG<br>5'ACTGCAGGTTTCATTCTTCTTGA  |  |
| <i>CIPK38</i> | <i>CIPK38</i>   | VIT_206s0004g07830   | 5'GAAATTTGAGGGCCTGAAGG<br>5'GCAACAACAACAGCTTTCCTGA    |  |
| <i>CIPK39</i> | <i>CIPK39</i>   | VIT_210s0003g04020   | 5'GGAACTGCTATGCCTTTGGGG<br>5'GTCTGGTGTGGCATCAACTGA    |  |
| <i>CIPK40</i> | <i>CIPK40</i>   | VIT_205s0020g00830   | 5'GTGGCAGCAGAGGTGTTTG<br>5'GCCAAGAGCTATTGAAAGTTTGA    |  |
| <i>CIPK41</i> | <i>CIPK41-1</i> | VIT_218s0001g07980.1 | 5'GATGTAAACGCTGTGTTTGATG<br>5'GACGAAGAGTAAAAAGGGTTGA  |  |
|               | <i>CIPK41-2</i> | VIT_218s0001g07980.2 | 5'GATGTAAACGCTGTGTTTGATG<br>5'AAAATATCAGATCTGACCAATGA |  |
|               | <i>CIPK41-3</i> | VIT_218s0001g07980.3 | 5'GATGTAAACGCTGTGTTTGATG<br>5'GTTCTCTTCACAACATATCTGA  |  |

|  |                 |                      |                                                       |  |
|--|-----------------|----------------------|-------------------------------------------------------|--|
|  | <i>CIPK41-4</i> | VIT_218s0001g07980.4 | 5'GATGTAAACGCTGTGTTTGATG<br>5'CTGGTTTAGCAATCCTAACTAA  |  |
|  | <i>CIPK41-5</i> | VIT_218s0001g07980.5 | 5'GATGTAAACGCTGTGTTTGATG<br>5'GAGGTTGGAACAACATGCTAA   |  |
|  | <i>CIPK41-6</i> | VIT_218s0001g07980.6 | 5'GATGTAAACGCTGTGTTTGATG<br>5'TTGC GTTTTATTGCCACTGTGA |  |

\*ORCAE platform, online resource for community annotation of eukaryotes (<http://bioinformatics.psb.ugent.be/orcae/overview/Vitvi>).

**Figure S1.** Nucleotide sequence of the *VvCBL* and *VaCIPK* transcripts.

>**VvCBL4-1**, *V. vinifera* v2.1|VIT\_216s0098g01870.1

ATGGGCTGCTTTTGCTCTAAGAAAGCTAGACAAACACCAGGATACGAGGAGCCTACTGTTCTTGCTGCTGAAACACCTTTTACTGTGTGCGAAGTAGAAGCCTTGATGAGCTATTTAAGAAATTAAGCAGTT  
CCATCATAGATGACGGGCTTATCCACAAGGAAGAATTCCAGCTTGCACCTTTCAGGAACAGAAATAAGAGGAATCTCTTTCAGATAGGATATTTGACCTGTTTGATGTCAAGCGAAATGGGGTTATTGAGTT  
TGGAGAAATTTGTTCTGTTTATTGGGTGTGTTTACCCAAATGCACCTGAAGCAGACAAAATTTCTTTGCTTTTCGACTGTATGATCTAAGGCACACCGGGTATATTGAGCGAGAGGAGTTGAAGGAGATGGTG  
CTGGCGCTTCTTCATGAATCAGATCTGATACTTTCAGATGAATATGTTGAACAAATTTGTTGATAAGACTTTCATGATGCAGATTCAAATGGTGATGGAAGGATTGACCCAGAAGAGTTGGAAGGAATTTGTAT  
CAAAGAATCCATCCCTGATAAAGAACATGACTCTCCATACCTAAAGGACATAACATTGGCATTTCACAGCTTTGTGATAAGCTCTGAAGTTGAAGACTCAGAAATATAG

>**VvCBL4-2**, *V. vinifera* v2.1|VIT\_216s0098g01870.8

ATGGGCTGCTTTTGCTCTAAGAAAGCTAGACAAACACCAGGATACGAGGAGCCTACTGTTCTTGCTGCTGAAACACCTTTTACTGTGTGCGAAGTAGAAGCCTTGATGAGCTATTTAAGAAATTAAGCAGTT  
CCATCATAGATGACGGGCTTATCCACAAGGAAGAATTCCAGCTTGCACCTTTCAGGAACAGAAATAAGAGGAATCTCTTTCAGATAGGATATTTGACCTGTTTGATGTCAAGCGAAATGGGGTTATTGAGTT  
TGGAGAAATTTGTTCTGTTTATTGGGTGTGTTTACCCAAATGCACCTGAAGCAGACAAAATTTCTTTGCTTTTCGACTGTATGATCTAAGGCACACCGGGTATATTGAGCGAGAGGAGTTGAAGGAGATGGTG  
CTGGCGCTTCTTCATGAATCAGATCTGATACTTTCAGATGAATATGTTGAACAAATTTGTTGATAAGGTGCAGATTACTGTAACCTTGCCACCTGCATTTTCATGCTTATTGATCTATATATTCAAAATTTCTTGT  
CTTCTCCACAGACTTTCAATGATGCAGATTCAAATGGTGATGGAAGGATTGACCCAGAAGAGTTGGAAGGAATTTGTATCAAAGAATCCATCCCTGA

>**VvCBL5**, *V. vinifera* v2.1|VIT\_202s0025g01630.1

ATGGGCTGTGCTTGTATGAAGCAGCGGCAGGAACGCAAAAGCGCAGTGCTTCTTGCTGCTCAAACTTGCTTTAAAGTGGCAGATGTGGAAGCTTTGTATGAGCTGTTTCAGGAAATTAAGCAGTTCTGTGGTTG  
ATGATGGACTTATCAGCAAAAGATGAGTTTCGGCTTGCTTATTCAGGAACAGCAAGAAGCAGAGTCTTCTTGCGATAGGATCTTCAATCTGTTTCGACTTGAAACATGATGGGATGATAGAGTTTGGAGAATT  
CATCCGGTCTTTGAGCATTTCACCCAGATGCTCCCAAGAAGAAAAAATTGCTTTTGCAATTCAATTATACAATACAGGACAGACAGGCTTCATCGAACATGAGGAGGTGAGGAGATGGTTTTCGCCCTTC  
CTGAATGAGTCAGACTTGATCCTTCTGATGACCTTGTGTAAGCCATTATTGATAAGACTTTCAGTGAAGTAGATACAAAAGGAGATGGAAGATTGATCCAGAAGAGTGGAATGAATTCATTCTCGGAATC  
CATCCATACTAAAGAACATGACCATCCCATATTTGAAGGATATCGGAACCTTCAATTTCCAGTTTTGTGCTGAGATCAGACCCTGAAGATTAA

>**VvCBL8**, *V. vinifera* v2.1|VIT\_202s0025g01640.1

ATGCTTGCTTTTACACGTTGCTTTTGCTGAAGAAGGCTAAGCAGCATCCTGGGTACGAGGACCCCACTACTCTTGCTTCTGAAACACCTTTTACTGTAATGAGGTGCGAGGCATTATACGATCTATTCAAGAA  
ACTAAGCAGTTCCATAATTGATGATGGTTTCATACACAAGGAAGAATTCAGTTTGCTCTTTTCAGGAACAGAAAGTAAGCAGAGTCTCTTTCAGACAGGGTGTGTTGATCTTTTGTATTAAGCATAATGGG  
GTCATTGAATTTGGAGAATTTGTTCGATCATTAAAGCATTTCACCCAAATGCTCCCAAGCAAGACAAAATGGAATTTGCATTTAAATTTGTATGATCTAAGGCAGACTGGCTACATTGAGCGTGAAGAGTTGA  
CGGAGATGGTTTCAGCTATTCTTAATGAATCGGATCTGGAATTTTCAGAAGACATTGTTGAATCAATCGTGGATAAGACAATGGCAGAGGCAGATTGAAAGGAGATGGGAAGATTGATAAAGAAGAGATGG  
AAGGAATTTGTAGCCCGGAATCCATCAATCCTAAGAAACATGACTCTCCATACCTTAAAGCAGATAAAGCTAGCATTTCAGCTTTGTGCTGAACCTCTGAGGTACAAGATTGAGATATTGTAGCCTAA

>**VvCBL10a1**, *V. vinifera* v2.1|VIT\_204s0008g00950.1

ATGAGTTCTTGCGAGGGAACGGCGAAGCTCTACATACAATTATTTGAGATCGAGCTCTCTCACAATAGGAGAGAAGTTATGTGCTGCTTTTATACCGTTTATAGGCATAATTGAAGCTCTGGTATTCGCTGTGGC  
CGGTTGCTGCGACTTCCACAAAAACAAGCATCACAAGAACTGAGATACGGGTTTCAGAGAGCTCTCGCAACTCGCCCGTGAATCGCAATTTACTGTCAATGAAGTGGAGGCAGTGTATGAGTTGTTTAAGAA  
GTTAAGTAGCTCAATTATTGACGATGGCTTGATTACAAGGAAGAGCTTCAATTGGCATTGTTCAAGTCTCCGCATAGTGAGAATCTTTTCCAGACAGGGTTTTATCTTTTGTATGAAAAGAAAAATGGTG  
TGATTGAATTTGACGAATTTGTCCATGCACTCAATGTCTTCCATCCCTATGCTCCTACAGAAGACAAAATAGATTTTGCATTTAGGTTGTATGATTGAGACAAAAGTGGATTATCGAGCGCGAGGAAGTTAAG  
CAAATGGTTATTGCCATTTTGTGGAATCTGATATGAATCTATCAGATGATCTTCTTGAGGCTATCATTGACAAGACATTGCTGATGCTGATGCTGACATGATGGTAAATCAACAAAGAAGAATGGAAG  
CTTTTGTACTTCGACACCCGAACCTCTTGAAGAACATGACTCTTCCTTATTTGAAGGACATCACCACAGTATTTCCAAGCTTTGTTTCAATACTGAGGTTGAAGAATGA

>**VvCBL10a2**, *V. vinifera* v2.1|VIT\_204s0008g00950.2

ATGAGTTCTTGCGAGGGAACGGCGAAGCTCTACATACAATTATTTGAGATCGAGCTCTCTCACAATAGGAGAGAAGTTATGTGCTGCTTTTATACCGTTTATAGGCATAATTGAAGCTCTGGTATTCGCTGTGGC  
CGGTTGCTGCGACTTCCACAAAAACAAGCATCACAAGAACTGAGATACGGGTTTCAGAGAGCTCTCGCAACTCGCCCGTGAATCGCAATTTACTGTCAATGAAGTGGAGGCAGTGTATGAGTTGTTTAAGAA  
GTTAAGTAGCTCAATTATTGACGATGGCTTGATTACAAGGAAGAGCTTCAATTGGCATTGTTCAAGTCTCCGCATAGTGAGAATCTTTTCCAGACAGGGTTTTATCTTTTGTATGAAAAGAAAAATGGTG  
TGATTGAATTTGACGAATTTGTCCATGCACTCAATGTCTTCCATCCCTATGCTCCTACAGAAGACAAAATAGATTTTGCATTTAGGTTGTATGATTGAGACAAAAGTGGATTATCGAGCGCGAGGAAGTTAAG  
CAAATGGTTATTGCCATTTTGTGGAATCTGATATGAATCTATCAGATGATCTTCTTGAGGCTATCATTGACAAGACATTGCTGATGCTGATGCTGACATGATGGTAAATCAACAAAGAAGAATGGAAG

CTTTTGTACTTCGACACCCGAACCTCTTGAAGAACATGACTCTTCCTTATTTGAAGTAA

>**VvCBL10a3**,V.vinifera v2.1|VIT\_204s0008g00950.3

ATGAGTTCCTTGGCAGGGAACGGCGAACTCTACATACAATTATTTGAGATCGAGCTCTCTCACAAATAGGAGAGAAGTTATGTGCTGCTTTTATACCGTTTATAGGCATAATTGAAGCTCTGGTATTCGCTGTGGC  
CGGTTGCTGCGACTTCCACAAAAACAAGCATCACAAGAACTGAGATACGGGTTTCAGAGAGCTCTCGCAACTCGCCCGTGAATCGCAATTTACTGTCAATGAAGTGGAGGCACTGTATGAGTTGTTTAAGAA  
GTTAAGTAGCTCAATTATTGACGATGGCTTGATTACAAGGAAGAGCTTCAATTGGCATTGTTCAAGTCTCCGCATAGTGAGAATCTTTCCCTAGACAGGGTTTTTATCTTTTTGATGAAAAGAAAAATGGTG  
TGATTGAATTTGACGAATTTGTCATGCACTCAATGTCTTCCATCCCTATGCTCCTACAGAAGACAAAATAGATTTTGCATTTAGGTTGTATGATTTGAGACAAAAGTGGATTATCGAGCGCGAGGAAGTTAAG  
CAAATGGTTATTGCCATTTTGTGGAATCTGATATGAATCTATCAGATGATCTTCTTGAGGCTATCATTGACAAGGTGTTGTTAAATTATAA

>**VvCBL10a4**,V.vinifera v2.1|VIT\_204s0008g00950.4

ATGAGTTCCTTGGCAGGGAACGGCGAACTCTACATACAATTATTTGAGATCGAGCTCTCTCACAAATAGGAGAGAAGTTATGTGCTGCTTTTATACCGTTTATAGGCATAATTGAAGCTCTGGTATTCGCTGTGGC  
CGGTTGCTGCGACTTCCACAAAAACAAGCATCACAAGAACTGAGATACGGGTTTCAGAGAGCTCTCGCAACTCGCCCGTGAATCGCAATTTACTGTCAATGAAGTGGAGGCACTGTATGAGTTGTTTAAGAA  
GTTAAGTAGCTCAATTATTGACGATGGCTTGATTACAAGGAAGAGCTTCAATTGGCATTGTTCAAGTCTCCGCATAGTGAGAATCTTTCCCTAGACAGGGTTTTTATCTTTTTGATGAAAAGAAAAATGGTG  
TGATTGAATTTGACGAATTTGTCATGCACTCAATGTCTTCCATCCCTATGCTCCTACAGAAGACAAAATAGATTTTGCATTTAGGTTGTATGATTTGAGACAAAAGTGGATTATCGAGCGCGAGGAAGTGAGT  
AGACATTTTTTTTTTCGTATCGGTTGTTGCCAAAAACTAG

>**VvCBL10b1**,V.vinifera v2.1|VIT\_204s0008g00960.1

ATGAACTCTACGGAGAGTCTTGGAGATCGAGCCCTGTAACAATGGGTGGGAGGTTTTGTGCTTCTTTCATACCATTCTTCTCCATAATTGAAGGTCTGGTGTTCGCTGTAGCCAATTTCTGCAGTATTCACCG  
CACCCACCACCACAGGAATTTACGGTACGGGCTCAGAGAGCTGACGCAGCTCGCCCGTGAAACGCAATTTACTGTAAATGAAGTGGAGGCTTTGTATGAGTTGTTTAAGAAGTTAAGTAGCTCAATTATTGAT  
GATGGCTTGATTACAAGGAAGAGCTCCAATTAGCACTTCTCAAGTCTCCATGTGGCCAGAACCTTTTTTTAGACAGGGTATTTTATCTTTTTGATGAAAGGAAAAATGGTGCAATTGAGTTTGTATGAATTTGT  
CCGTGCACTCAGTGTCTTCCATCCCTATGCCCAATGGAAGACAAAATAGATTTTGCATTTAGGCTGTATGACCTGAGACAAACCGGATTTATTGAGAGAGAAGATGTTAAGCAAATGGTAATTGTCACTTTG  
ATGGAATCGGAGATGGATCTGTGATGATCTTCTTGAGGCTATCATTGACAAGACATTTGTTGATGCTGATGCTGACAGGGATGGCAAAATCAGTAAAGAAGAATGGAGGGCTTTTGTACTTAGACACCCA  
AATCTCTTAAACAACATGAGTCTTCTTATTGAAGGATGTCACTACAGTATTTCCGAGTTTGTGCATCAATTCGAGGTTGAGGACTGA

>**VvCBL10b2**,V.vinifera v2.1|VIT\_204s0008g00960.2

ATGGTTGGGATATGTTGTTTTCGACAGAGATCGAGCCCTGTAACAATGGGTGGGAGGTTTTGTGCTTCTTTCATACCATTCTTCTCCATAATTGAAGGTCTGGTGTTCGCTGTAGCCAATTTCTGCAGTATTCAC  
CGCACCCACCACCACAGGAATTTACGGTACGGGCTCAGAGAGCTGACGCAGCTCGCCCGTGAAACGCAATTTACTGTAAATGAAGTGGAGGCTTTGTATGAGTTGTTTAAGAAGTTAAGTAGCTCAATTATTG  
ATGATGGCTTGATTACAAGGAAGAGCTCCAATTAGCACTTCTCAAGTCTCCATGTGGCCAGAACCTTTTTTTAGACAGGGTATTTTATCTTTTTGATGAAAGGAAAAATGGTGCAATTGAGTTTGTATGAATTTGT  
GTCCGTGCACTCAGTGTCTTCCATCCCTATGCCCAATGGAAGACAAAATAGATTTTGCATTTAGGCTGTATGACCTGAGACAAACCGGATTTATTGAGAGAGAAGATGTTAAGCAAATGGTAATTGTCACTT  
TGATGGAATCGGAGATGGATCTGTGATGATCTTCTTGAGGCTATCATTGACAAGACATTTGTTGATGCTGATGCTGACAGGGATGGCAAAATCAGTAAAGAAGAATGGAGGGCTTTTGTACTTAGACACC  
CAAATCTCTTAAACAACATGAGTCTTCTTATTGAAGGATGTCACTACAGTATTTCCGAGTTTGTGCATCAATTCGAGGTTGAGGACTGA

>**VvCBL11**,V.vinifera v2.1|VIT\_219s0015g01070.1

ATGTTGAGTGCTTAGAGGATTTAAGCATTTAATTGCTTCCCTACTGCGGTGTTGTGATCTTGATTGTATAATCAAGCAAGAGGTCTTCAAGATCTGAAGTTCTTGCAAGGGAAACAGTGTTTGTAGTGAAG  
TGAAATCGAGGCACTATACGAGCTGTTTAAGAAGATCAGCAGCGCTGTGATTGATGACGGTCTGATCAACAAGGAAGAGTTTCAATTGGCTTTGTTCAAAACAAACAAAAAGGAAAGCTTATTTGCTGATCG  
GGTATTTGACTTGTTTGACACAAAGCATAACGGAATACTTGGCTTTGAGGAGTTTGCTCGTGCTCTATCTGTTTTTACCCCAACGCACCTATCGACGACAAGATTGAGTTTCTTTTCAGTTATACGATCTCAA  
GCAGCAGGGTTTCATTGAGAGGCAGGAGGTGAAGCAAAATGGTAGTGCCACACTTGCTGAATCTGGTATGAATCTTTCGGATGATGTTATAGAAAAGTATCATTGACAAGACCTTTGAGGAAGCTGACACAAA  
ACATGATGGAAGATGTGACAAAGAAGAGTGGAGAAGCCTTGTTCTACGACACCCATCCCTTTTGAAGAATATGACTCTTCAATACCTCAAGGACATCACCACCACATTTCCAAGCTTTGTCTTTCATTCTCAA  
GTTGACGACACCTGA

>**VvCBL12**,V.vinifera v2.1|VIT\_200s1569g00020.1

ATGGTAGTGCTACGCTTGCTGAATCTGGCATGAATCTTTCAGATGATGTAATAGAAAAGTATCATTGATAAGACCTTTGAGGAAGCTGATACTAAACATGATGGGAAGATAGACAAGGAAGAATGGCGAAGC  
CTTGTTTTGCGACATCCATCTCTTTTGAAGAATATGACCCTTCAATACCTAAAAGACATCACCCTACATTCCCAAGTTTTGTGTTTCACTCACAAAGTGATGACACTGA

>**VvCBL13-1,2**,V.vinifera v2.1|VIT\_202s0236g00140.1

ATGGGCTGCTTTCAGTCAACAGCAAGAAAGCAGTTTCTGGACATGAGGACCCAGTAATTTCTTGCTTCCCAACAGCTTTTGTGTTGAGTGAGTGAAGTTGAAGCACTATTTGAGCTATTCAAGAGCATTAGCAGTT  
CTGTAATTGATGATGGGTTAATAAAACAAGGAAGAGTTTCAATTGGCTCTATTCAAGAACAGAAAGAAGGAGAATCTCTTGCAAATAGGATCTTTGATCTTTTTGATGTTAAGCGGAAGGGAGTCATTGATT  
TGGTGACTTTGTCAGGTCATAAATGTTTTCCATCCAAATGCCCCACAAGAAGACAAAATTGATTTTTTCAATCAAGCTCTATGATTTGGATAGCACAGGATTCATTGAGCGGCAAGAGGTCAAACAAATGTTA  
ATTGCACTTCTGTGTGAATCTGAAATGAAGTTGGCTGATGAAACCATCGAGATAAATCTTGATAAGACATCTTTGGAAGCTGACGTAAATCAGGATGGGAGGATTGATAAATCTGAGTGGCAGAATTTGTTT  
CTCGGAACCCATCATTGTTGAAGATAATGACACTTCCTTATCTAAGGGACATAACGACAACCTTTCCGAGCTTTGTGTTTAAATTCAGAGGTGGATGAGATTGCTACATAA

>**VvCBL13-3**,V.vinifera v2.1|VIT\_202s0236g00140.3

ATGGGCTGCTTTCAGTCAACAGCAAGAAAGCAGTTTCTGGACATGAGGACCCAGTAATTTCTTGCTTCCCAACAGCTTTTGTGTTGAGTGAGTGAAGTTGAAGCACTATTTGAGCTATTCAAGAGCATTAGCAGTT  
CTGTAATTGATGATGGGTTAATAAAACAAGGAAGAGTTTCAATTGGCTCTATTCAAGAACAGAAAGAAGGAGAATCTCTTGCAAATAGGATCTTTGATCTTTTTGATGTTAAGCGGAAGGGAGTCATTGATT  
TGGTGACTTTGTCAGGTCATAAATGTTTTCCATCCAAATGCCCCACAAGAAGACAAAATTGATTTTTTCAATCAAGCTCTATGATTTGGATAGCACAGGATTCATTGAGCGGCAAGAGGTCAAACAAATGTTA  
ATTGCACTTCTGTGTGAATCTGAAATGAAGTTGGCTGATGAAACCATCGAGATAAATCTTGATAAGACATCTTTGGAAGCTGACGTAAATCAGGATGGGAGGATTGATAAATCTGAGTGGCAGAATTTGTTT  
CTCGGAACCCATCATTGTTGAAGATAATGACACTTCCTTATCTAAGGTGGGTAATCACAATGTTCTGGTCTCAAGCATCAACAATCATCACAATGAAGCTTTTTTTGACAGTTGAGTAA

>**VvCIPK3**,V.vinifera v2.1|VIT\_206s0009g01840.1

ATGAATCCACCTAAAGTCAAGCGTCGAGTTGGGAAATATGAGGTGGGAAGGACAATTGGGGAGGGTACATTTGCGAAAGTCAAGTTTGCAAGGAATTCTGAGACTGGGGAACCGGTTGCTATAAAGATCCTGGACAAAGAGAAGGTTCTGAAACACAAAATGGCTGAACAGATAAAGCGGGAAAGTAGCAACAATGAACTAATAAAGCATCCAAATGTTGTTGCTTATATGAGGTAATGGGGAGCAAGACAAAGATATTCATTGTTTTAGAGTTTGTACTGGGGAGAGCTCTTTGACAAAAATGTAAACCATGGGCGAATGAGGGAGGATGAAGCACGAAGGATTTCCAGCAGCTTATTAATGCTGTTGATTATTGTACAGTAGGGGTGCTACCACAGAGACTTAAAGCCAGAAAATCTGCTGTTGGATGCTTATGGAACCTCAAAGTTTCTGATTTTGGATTAAGTGCATTGTCCCAACAAGTCAGGGATGATGGCCTGCTTCACACTACCTGTGGAAC TCCAAACTATGTTGCCCTGAGGTCTTAATGACAGAGGCTATGATGGTGCAACTGCAGACTTGTGGTCTGTGGTGTTATACTCTTTGATTGCTTGCAAGGGTACTTGCCCTTTTGATGATTCTAATCTTATGAT CCTATATAAAAAAATATCAGCTGCAGAAATTTACTTGTCCACCTTGGCTCTCTTCGGTGCTATGAAATTGATAACTCGCATTTTGGATCCCAACCCTATGACTCGTATTACAATCCCTGAAATTCTAGAAGATG AATGGTTTAAGAAAGGTTATAAGCCCCCTGTGTTTGAGGAGAAAAGGAGATGCAAACTTGGATGATGTAGAAGCTGTATTTAAAGATTTCAGAAGAACATCATGTTACAGAGAAAAACGGAGGAACAACCGCA GCAATGAATGCATTGAAATTAATTTCCATGTCAAGAGGGCTCAACCTTGGGAATTTGTTTGATATAGAACAGGGATTCAAGAGAGAAAACGAGGTTACGTCAAAATGCCCTGCCAATGAGATAATTCATAAG ATTGAAGAAGCTGTGAAGCCTCTTGGGTTTGATGTTTCAAGAAAAACTATAAGATGAGGCTTGAAAAATATGAAAGCTGGGAGAAAAGGGAACCTTAATGTGGCTACAGAGGTATTTCAAGTGGCACCTTCT CTTCATATGTTGAGGTTGCAAAAGCAAAAGGAGATACTCTGGAGTTCATAAGTTCTACAAAAATCTTTCGACCTGCCTTGAGGATGTGGTTTGAAAACTGAGGATGACATGCAAGAAACGAAATAA

>VvCIPK9-1.V.vinifera v2.1|VIT\_215s0048g02740.3

ATGAGCATGAAGGTTCCGGCGACGAGGACGCGTGTGCGGAGATACGAAATCGGTAACCTTGGGTGAGGGGAGCTTCGCCAAGGTCAAGTACGCTCGCAACTCCGACACCGGCGATAGCGTCGCCATCAA GGTGCTCGACCGCGATCATGTTCTCCGGCACAAGATGGTGGAACAGATAAAAAAGAGAGATATCGACAATGAAGCTGATTAAGCATCCGAATGTTGTGACGATCTTCGAGGTTATGGCGAGCAAAACAAAGA TCTACATTGTCGTTGAGTTTGTGACGGAGGAGAGCTCTTTGACAGAAATTGCCAAGAATGGGAGACTTAAAGAGGATGAAGCCAGGAGATACTCCAGCAGCTCATTAAATGCTGTAGATTATTGCCACAGTA GAGGCGTGTACCATAGAGATTGAAGCCCGAGAATTTACTTCTGGATTTCATACGGTGTCTTAAAAATATCAGACTTTGGATTGAGTGCCCTTTCACAGCAAGTGAGGGAAGATGGGCTGTTTCACACTGCCTG TGGGACGCCAAATATGTTGCTCCTGAGGTTCTCAATAATAAAGGATATGATGGTGCACTGATATATGGTCTTGTGGGGTCAATCTATTGTACTTCTGGCTGGGTACTTGCCCTTTTGATGAAGTAAGCC TCATGGCTTTGTATAAAAAAGATCTGCAAGGCTGATTCTCATGTCCATCATGGTTATCACCTGGTGCAAAGAAGCTGATAAACCGTATTCTTGATCCCAATCCTGTAACCTCGGATAACAATTCCTGAAATCTTG GAAGATGGATGGTTCAAGAAAGGGTACCAGCCAACATGTTTTTCAGCAGGAAGAGGATGTGAATGTTGATGATGTGGATGCTGCTTTCAATAATTACAGAGGAAAAATCTTGTGACAGAAAGGAAAGAAAAACC TGTCTCCATGAATGCCTTCGAGCTTATTTCTAGGTCTCAGAGTTTCAATCTTGAAAACTTGTTCGGGAAGCAGGCGGGTCTTGTGAAGCGAGAGACAAGTTTCACTTCCCAGCGCCCTGCCCATGAGATTATGT CTAATAATTGAGGAAACTGCAAAAGCCTTAGGTTTCAACGTTTCGCAAGCAAAACTACAAGATGAAGTTGCAAGGTGACAAAACTGGACGGAAGGGTCATCTCTGTAGCTACTGAGGTGTTTGAGGTGGCTC CTCTCTTGACATGGTGGAGCTTCGGAAAACTGGTGGTGACACACTGGAGTTCCACAAGTTCTACAAAAGCTTCTCTTCAGGATTAAGAGATATAGTCTGAAAAATCAGAAGCGAATACTGAAGAATTGAGGT GA

>VvCIPK9-2.V.vinifera v2.1|VIT\_215s0048g02740.4

ATGAGCATGAAGGTTCCGGCGACGAGGACGCGTGTGCGGAGATACGAAATCGGTAACCTTGGGTGAGGGGAGCTTCGCCAAGGTCAAGTACGCTCGCAACTCCGACACCGGCGATAGCGTCGCCATCAA GGTGCTCGACCGCGATCATGTTCTCCGGCACAAGATGGTGGAACAGATAAAAAAGAGAGATATCGACAATGAAGCTGATTAAGCATCCGAATGTTGTGACGATCTTCGAGGTTATGGCGAGCAAAACAAAGA TCTACATTGTCGTTGAGTTTGTGACGGAGGAGAGCTCTTTGACAGAAATTGCCAAGAATGGGAGACTTAAAGAGGATGAAGCCAGGAGATACTCCAGCAGCTCATTAAATGCTGTAGATTATTGCCACAGTA GAGGCGTGTACCATAGAGATTGAAGCCCGAGAATTTACTTCTGGATTTCATACGGTGTCTTAAAAATATCAGACTTTGGATTGAGTGCCCTTTCACAGCAAGTGAGGGAAGATGGGCTGTTTCACACTGCCTG TGGGACGCCAAATATGTTGCTCCTGAGGTTCTCAATAATAAAGGATATGATGGTGCACTGATATATGGTCTTGTGGGGTCAATCTATTGTACTTCTGGCTGGGTACTTGCCCTTTTGATGAAGTAAGCC TCATGGCTTTGTATAAAAAAGATCTGCAAGGCTGATTCTCATGTCCATCATGGTTATCACCTGGTGCAAAGAAGCTGATAAACCGTATTCTTGATCCCAATCCTGTAACCTCGGATAACAATTCCTGAAATCTTG GAAGATGGATGGTTCAAGAAAGGGTACCAGCCAACATGTTTTTCAGCAGGAAGAGGATGTGAATGTTGATGATGTGGATGCTGCTTTCAATAATTACAGAGGAAAAATCTTGTGACAGAAAGGAAAGAAAAACC TGTCTCCATGAATGCCTTCGAGCTTATTTCTAGGTCTCAGAGTTTCAATCTTGAAAACTTGTTCGGGAAGCAGGCGGGTCTTGTGAAGCGAGAGACAAGTTTCACTTCCCAGCGCCCTGCCCATGAGATTATGT CTAATAATTGAGGAAACTGCAAAAGCCTTAGGTTTCAACGTTTCGCAAGCAAAACTACAAGATGAAGTTGCAAGGTGACAAAACTGGACGGAAGGGTCATCTCTGTAGCTACTGAGGTGTTTGAGGTGGCTC CTCTCTTGACATGGTGGAGCTTCGGAAAACTGGTGGTGACACACTGGAGTTCCACAAGGCATGCTAA

>VvCIPK12.V.vinifera v2.1|VIT\_210s0003g01420.1

ATGGCAGACAGGCAGAGCAAGGAGAACACAAGCAAAAGGAAGAACGGGGAGAACCAATCTTTGCTTCTGGGGCGGTACGAGATCGGGAAGCTTCTGGGGCATGGGACATTCGCCAAGGTCTACCACGCCA GGAACGTCGGATCCAACGAGAGCGTGGCCATCAAAGTTCATCGACAAGGAGAGATCCCTCAAAGGCGGTTTGATCGCACATATCAAGCGCGAGATCTCCATACTCCGCCGCGTTCGCCATCCCAACATCGTTC AATTGTTTGAAGTCATGGCCACCAAGGCTAAGATCTACTTCGTCATGGAGTACGTCAGGGGCGGAGAGCTCTTCAATAAGGTCGCCAAAGGCCGCTCAAGGAGGAGGTGCTCGCAAGTATTTCCAGCAGT TGATCTCCGCCGTCGGCTTCTGCCACGCCAGAGGGGTCTACCACCGCGACCTCAAGCCCGAGAATCTCTTACTGGACGAAGCCGGTGACCTCAAAGTCTCCGATTTTGGGCTTAGCGCTGTCTCTGATCAGAT GAGGCAGGATGGCCTGTTCCACACCTTTTGTGGGACTCCGGCGTATGTGGCACCTGAGGTTTGGCCCGGAAGGGCTATGACGCATCCAAGGTTGATATATGGTCGTGCGGTGTGATACTCTTCGTCCTTGATG GCTGGGTATCTCCCTTTCCATGATCAGAACATCATGGCCATGTACAAGAAAATCTACAAGGGTGAATCCGATGCCCTCGGTGGTTTTCGCCGAGCTCGCTCGGCTTCTTACTCGGCTCCTCGATACGAACCC GGAAACCAGAAATCAAAATCCCGAGATTATGGAGAATCGGTGGTTTAAAGAAAGGTTTAAACATATTAATTTTACATTGAGGATGATACGCTTAGACTCTGTAATGCTGAGGAGGCTGAGGATGATGTGGA GTCTTTGTCCGATCAATCTATGTGAGAGTCGGAGTTCGGAGTTGGAGACTCGGAGGAGGCTTCTACATTGCCAAGACCGCGAGTTTGAATGCATTGATATTATATCATTTTACCAGGTTTCGATCTCTCTG GATTGTTTGAGGAGGGAGGTGGAGACGCGGATTTGTGTGCGGTGCACCTGTATCGAAGATTATATCAAAATTAGAGGAGATTGCCAAGGTGGTGAGCTTTACAGTGAGGAAGAAGGATTGTAGGGTGAGCT TAGAGGGATCCAGAGAGGGGGTGAAGGGGCCATTAAACGATTGCAGCTGAGATTTTGAGTTAACGCCCTCATTGGTGGTGGTGAAAGTTAAGAAGAAAGGAGGCGACAAAGGGGAGTATGAGGAGTTCTGT AATCGTGAATTAACCCCGTGTGTCAGAACCTTGTGATGACTCTGCTCTTCACATTTTCAAACTCCTTGCACAAAGGAGAGTGTGGGCAACTTTCTAATCTGGAATTGGAGTCTGGATTGAAGAACCT TGTGGTGGATGACTCTGCTTACACCACATTTGCCCTCAGATACTGAATAG

>VvCIPK21-1.V.vinifera v2.1|VIT\_211s0052g01700.2

ATGGGAGTGGCTAATAACATAGGGAAGTACCAGCTGAGTAGGACGATCGGAGAAGGTACTTTTGCCAAGGTTAAGTTGGCAGTGAACACCGAGAATGGCCAGTATGTTGCCATCAAGATCATCGACAAGCA CATGGTCATGGAGAACAATCTCATCTTTCAGGTACAGAGAGAGATAAGAACGATGAAGCTTCTGCATCATCCCAACATTGTTAGGATACATGAGGTCAATTGGCACCAAGACAAAGATTACATAGTAATGGA ATATGTATCAGGAGGGCAGCTCTCAGACAAGATGTCTTACGTCAAGAAGCTAGATGAACAGGATGCTAGAAAAATTTCCAGCAGTTGATTGATGCAGTGGACTACTGCCATGGCAGAGGGGTTTCTCATAG AGATCTAAAGCCAGAGAACTTGCTTTTGGACAGCAAAGGAAATGTAAAAGTCTCGGATTTTGGACTCAGTGCATTGCGCAAGCCTGGAGATGTGTTATCCACAGCATGCGGTTACCATGCTATGTAGCACC

AGAGCTGCTTGCAAATAGGGGCTACGATGGAGCAGCTGCAGATATTTGGTCTTGTGGAGTAATCCTTTTTGAGTTACTTGCTGGTTATCTTCCATTTGATGATCGCAATTTGATGAGCTTGTATAAGAAGATAA  
CAAAAGCAGAGTACACTTGTCCAGAGTGGTTCACACCAAGCCAAACAAAGCTAATCTCCAGGATCCTTGAGCCCAACCTAGACGGCGAATATCAATAGCAGAGATTGTTGAAGATGAGTGGTTTCAGATTG  
ACTACGAACCTGCTTCTGGAATTGAATTTGATGACAAAATCAACCTAGATGATGTTTCATGCTGCTTTCAATTTGATTGAGGAAAAATAACGCCGAAGCAAAGGTACCCCACTCAAGTTTCATTAATGCTTTCCA  
ACTAATAGCAATGTCACATGACCTCGATTTGTCAGGTCTTTTTGAAGAGAAGGATGACAACAAGCAGAAAGCAAGGTTTGGATCCAAGCACACAATTGATGAAACTATAAAGAAAATTGAGGCCGCTGCAA  
AGGATGTGAGCCTCTCAGTTGAAAGGAAGAACTCTAAGATGAAGATGCATCCACAACAGAAGATGACTAGATGTTCTCGATCATATTTCAACCTATCAGCAGAGGTGATTGAGGTGGCTCCCACTCATTGTG  
TTGTAGAAATATCAAAATCTGCAGGCGAGCTTGGTGTGTACAAAGAGTTCTGCACAAGCCTATCATGTCTGCTAAAAGAGAAATCGGGCATTCCATTAGAAGAAAAAGATTCCAATGAAGATGTCGTTAAACA  
TCAAAGATATTCAGGAACTGAATGCTTGTGAAAAGAAAGATGACAAGGACGACAAAGACATCAATGGCTATTCTTCTCTTTGA

>VvCIPK21-2.V.vinifera v2.1|VIT\_211s0052g01700.3

ATGGGAGTGGCTAATAACATAGGGAAGTACCAGCTGAGTAGGACGATCGGAGAAGGTACTTTTGCCAAAGTTAAGTTGGCAGTGAACACCGAGAATGGCCAGTATGTTGCCATCAAGATCATCGACAAGCA  
CATGGTCATGGAGAACAATCTCATCTTTCAGGTACAGAGAGAGATAAGAACGATGAAGCTTCTGCATCATCCCAACATTGTTAGGATACATGAGGTTCATTGGCCACCAAGACAAAGATTTACATAGTAATGGA  
ATATGTATCAGGAGGGCAGCTCTCAGACAAGATGTCTTACGTCAAGAAGCTAGATGAACAGGATGCTAGAAAACATTTCCAGCAGTTGATTGATGCAGTGGACTACTGCCATGGCAGAGGGGTTTCTCATAG  
AGATCTAAAGCCAGAGAACTTGCTTTTGGACAGCAAAGGAAATGTAAAAAGTCTCGGATTTTGGACTCAGTGCATTGCGCAAGCCTGGAGATGTGTTATCCACAGCATGCGGTTACCATGCTATGTAGCACC  
AGAGCTGCTTGCAAATAGGGGCTACGATGGAGCAGCTGCAGATATTTGGTCTTGTGGAGTAATCCTTTTTGAGTTACTTGCTGGTTATCTTCCATTTGATGATCGCAATTTGATGAGCTTGTATAAGAAGATAA  
CAAAAGCAGAGTACACTTGTCCAGAGTGGTTCACACCAAGCCAAACAAAGCTAATCTCCAGGATCCTTGAGCCCAACCTAGACGGCGAATATCAATAGCAGAGATTGTTGAAGATGAGTGGTTTCAGATTG  
ACTACGAACCTGCTTCTGGAATTGAATTTGATGACAAAATCAACCTAGATGATGTTTCATGCTGCTTTCAATTTGATTGAGGAAAAATAACGCCGAAGCAAAGGTACCCCACTCAAGTTTCATTAATGCTTTCCA  
ACTAATAGCAATGTCACATGACCTCGATTTGTCAGGTCTTTTGAAGAGAAGGATGACAACAAGCAGAAAGCAAGGTTTGGATCCAAGCACACAATTGATGAAACTATAAAGAAAATTGAGGCCGCTGCAA  
AGGATGTGAGCCTCTCAGTTGAAAGGAAGAACTCTAAGATGAAGATGCATCCACAACAGAAGATGACTAGATGTTCTCGATCATATTTCAACCTATCAGCAGAGGTGATTGAGGTGGCTCCCACTCATTGTG  
TTGTAGAAATATCAAAATCTGCAGGCGAGCTTGGTGTGTACAAAGAGTTCTGCACAAGCCTATCATGTCTGCTAAAAGAGAAATCGGGCATTCCATTAGAAGAAAAAGATTCCAATGAAGATGTCGTTAAACA  
TCAAAGATATTCAGGAACTGAATGGTAA

>VvCIPK24.V.vinifera v2.1|VIT\_211s0016g05420.1

ATGAAAAAGGTCACGAGAAAGGTTCGGAAGATGAGGTTCGGCCGAACAATTGGCGAAGGAACTTTTCGCCAAGGTTAAATTTGCGCACAAACCCGAGACTGGGGAGAGCGTAGCTATGAAGGTTATGGCAA  
AGTCCACCATTTCTAAGCATAGGATGGTGCATCAGATTAAACAAGAGATATCCATAATGAAGATTGTCAGGCACCCTAACATAGTTAGATTGCATGAGGTCTTGGCCAGCCAGACAACGATATATATTATTCT  
TGAGTTTGTCACTGGAGGAGAACTATATGATAAAATTTGTTACCAAGGAAGACTCTCTGAAAATGAATCCAGGCGATACTTTCAGCAGCTTATAGATGCTGTATCACATTGTCACAGTAAGGGTGTGTACCAC  
AGAGATCTGAAGCCTGAAAACTACTTCTTGATTGCAATGGAATTTGAAGGTTTCTGATTTTGGACTAGTGCATTAACAAAGGGGTTGGACTTCTTCATACCACATGTGGAACCCCAAAATTATGTTGC  
ACCTAGGTTGCTTAGTAACCAAGGTTATGACGGTGCAGCTGCTGATGTGTGGTCATGTTGAGTCACTTCTATGTTCTAATGGCAGGATATCTTCCATTTAATGAGATAGACCTTCCAAGCTTGACAAAA  
CGTATTTCGGATTGAAGGGATAAAAAATGATCCATGGTTTCGAAAGAAGTACGTGTCTAGCAAAATGTAGAGAAGATGAAGAAGTGAATTTGGATGATATTCATGCGGTTTTGATGATATTGAGGAAAAATTAC  
GTATCTGAGCAGTCAGGAAATAATGACACAGGTCTTTGATAATGAATGCATTTGAGATGATTACCCTATCCCAAGGGTTGAATCTATCAGCACTTTTGACAGACGACAGGATTATGTAACCGGCAAACTC  
GTTTTGTTTTCCCGCAACCAGCAAAAGTTATAATTTCTACTATTGAAGCTGTGGCAGAATCTATGAATTTCAAGGTCCATACACGCCACTACAAGACAAGACTCGAGGGAATATCTGCAAATAAGACTGCACA  
ATTTGAGTTGCTCCTAGAGGTTTTGAAGTTGCACCTGCTCTTTTCATGGTGAGATGTGAAAAGGCTGCTGGGGATACACTTGAATATCACAAAGTTTTACAAGAAATTTCTGTGCTAAACTTGAGCATATCATCT  
GGAAACCAAAAAGAGGCTATGACAAATTCCAGTCTTCTAAGAACAATGACTTGCTGA

>VvCIPK27.V.vinifera v2.1|VIT\_208s0058g01090.1

ATGAGCAGTGAGCACCACCGGTCCACCACATCAAGGCGCTTTGTTCTTCTCCGAAAATTGTGGTTTCAGAGATGGAGAACGATACTGGAGATGCTGATCCGGCGAACGAAGATATTCAGCCGGAGATAACT  
TTGTTTCGAAAAGTACGCGGTTGGAAAAGTTGCTCGGCTATGGAGCCTTCGCGAAGGTCTACCAACGCAAGGAACATCCGAACGGGCCAAAGCGTGGCGATCAAGGCGGTGAGCAAGAAAAAGGTGATGAAAGG  
AGGATTGACGGCCCATGTGAAGCGGGAGATTCTATCATGCGCCGGCTACGGCATCTCACATCGTTAAGCTGTATGAGGTCTTGGCGACGAAAAACGAAGATCTACTTCGTGATGGAGTACGCCAAAGGTGG  
TGAGCTCTTTACAAAAATAGCCAAGGGGCGGTTTCAGCGAAGACCTCAGTCGCCGTTATTTTCAGCAGCTGATCTCCGCCATTGGATATTGCCACTCCCGAGGCGTTTTCCACC CGCATTTGAAGCCGGAGAAC  
CTTCTTCTCGACGAGAATTGGAACCTTAAAGTCTCCGATTTCCGGTCTCAGCGCCGTGAAGGATCAGATCCGGGCCGATGGTCTCTACACACTCTCTGCGGTACCCCGGCGTATGTGGCGCCGGAGATTCTAG  
CGAAGAAAGGTTACGATGGTACCAAGGTGGATATCTGGACTTGGCGCATATTCTCTATGTATTGAACGCCGTTATCTTCCGTTCAACGATCCAAACCTCATGGGAATGTACCGGAAGATCTATAAAGGCCGA  
GTTTCGGTGTCCGAAATGGACTTCTCTGATATGCGACGCCTTCTATCAGCCCTTCTCGATACGAATCCAGAGACGAGAATCACTGTGATGAGATCATCCGTGACCCTTGTTTCCAAAAGGGTTACAAGGAA  
ATTAATTTCCACGTGGAAGATTTTGATTTCAAGGATCAGACGACGACGACGACAACGCCGAGTACATGAACGCGTTCCACATTATCTCATTCTCGTCCGGTTTCGAATTCTCCAGTATGTTGAACGATTCCG  
GCATTTCCGGTGGCCGTTGAAAGATTCTGATCGGCCGAGTCACCGGAGAAAAATAATAGAAAAGGTTCGAGGACGTGGCAAAAAAGGAGAACGTAACAGTGACGAGAAAGGAAAAATTGGGGAGTGATGTTGGA  
GGGACAAAACGGTAATTTTCGCTTGATAATGGAGATATATCGGTTGACGGAGAAAGCTGGTCTCGGTAGAGGTGAGGAAGAAAGAGGTGGACGCTGGACTAGGACCTGGCAAAAGAAATCTGGCGAGACACAC  
TCCGGCCGACGTCAGCGAACTGATTATCAACCGAGGAGCCGAGCACCAGAGCTGA

>VvCIPK28.V.vinifera v2.1|VIT\_206s0004g07870.1

ATGCCAGAGATCGAACGCGGCTCAGGGAGTGGGGCCGCTTCGGCTACCTCGTCGGAGAAGGCTTTGTTTGGGAAGTATGAGCTCGGCAGATTGCTGGGCTGTGGGGCGTTTTCGAAGGTGATCATGCGAGG  
AATATCAGGACAGGGCAAAGTGTGGCCATTAAGACCAATATGTAAGAAGAAGATCGTTGGGAGCAACTTGATGGCGAATGTGAAACGGGAGATCTCTATCATGCGCCGGTTGCAGCACCCCTCACATCGTGAA  
GCTGTATGAGGTGTTGGCGACCAAGACCAAGATCTATTGCGTATGGAGTTCGTGAAAGGTGGGAGCTGTTTCGCGAAGGTCCCAAGGGCGGTTTCAGCGAGGATCTGAGCCGTGCGTATTTCAGCAGATT  
GATCTCCGCGCTCGGCTACTGCCATTTCGCGGGGGTGTTCACCGGGATCTGAAACCGGAGAACTCTCGTTGACGAGAAACCGGTCCTTGAAGGTTTCAGATTTTCGGGCTCAGCGCCTTGACCGGATCAGATT  
CGCCTCGACGGCTCTGACACCTTGTGCGGCACTCCAGCTTACGTGCGCGCGGAGATTCTACCAAGAAAGGCTACGATGGGGCGAAAGTGGATGTGTGGTCTGCGGAGTCATCTCTTCGTGTTGAACG  
CCGGTTACCTACCTTCAACGATCCCAATCTCATGGCCATGTACAAGAAAATATACAAAGGCGAGTTCGGTGCCTAAATGGATGTGCGCGGACCTTAAACGTTTCTTTCTCGCTCTCTGACACCAACCC  
AACACCAGGATCACCCTCGATGAAATCTGACAGGCCATGGTTTCAGAAAAGGATACAAAGAGGTGAAGTTCCATGAAGAAGATTTTCGACTCAAAATCCGAAAAAGAGGACCGAAGCCCCACGAACCTTGAA  
TGCTTCGACATAATTTCTGTTCTGTTGAACTTGTGCGGTCTGTTCAATGACTCGTCCAGTCTGCGCCGATGACGACGAGCGATTGTATCGGCCGAGCCGTGGAGAAAAATAATCGAGAAAAATC

GAGGAAATTGCCGAAGGTGAGAACCTGACGGTGAATTGGAAGAAGGAATGGGGAGTTGACCTGCAGGGACCAAATGGTAATTTCAATAATCGGGGTTCAAATTGATCGATTAACCCATGATTTGGTCGTCGTG  
GAGGTTAGGAGGAGACCGCGCATGCAGCGGCCTACGCCGCCGCTGGAAGGATAAGCTCCGGCCGGCGCTCGCCGGACTCATGTTCCAAGGACCGGAGACCCAAGTCGCCGGCGATTAA

>**VvCIPK29**.V.vinifera v2.1|VIT\_205s0020g04570.1

ATGGAACCTACCCCTGCCGGGTTATCCTTGGCAAGTACAAACTCGGCCGCCTTCTCGGCCGAGGCAGCTTCGCCAAGGTGTACCAGGGCCACTCCATCACCGACGGCACTGCCGTGGCCGTGAAGATCATG  
GACAAGGCAGGAAGTGTGTAGGCCGGCATGGAGTCTCGGATCGTTTCGCAAGTGTACTGCCATGCGGAGCCTTCAGCATCCCAACATCCTCAAAATCTACGAGATCATGGCCACTAAGTCCAAGATTTACTTGT  
ATTATTGAGTTGGCCAAAGGAGGCGAACTCTTACCAAAAATCTCCCGCCGCGGGCGCCTCACTGAGGCAGCGCGCGCGCTTACTTCCAACAACTGGTATCGGCTCTCTTGTCTGCCACCAGAACGGCGTGG  
CTCACCGCGACATGAAGCCGCAAGACCTTCTCCTGGACCAAGGACGGTAACCTCAAGGTCTCCGACTTCGGGCTGTCCGCGCTTCCGGATCAACTTAAGAACCGGCTGCTCCACACAGCTTGTGGCACGCCTGC  
GTACACGGCGCGCGGAGGTCGTTTCTCGGAAAGGCTACGACGGCGCAAAGGCGGACGCGTGGTCTTGGCGAGTCATACTTTTCGTCTTTCTTCTGGCTTTCTCCCGTTCGATGATAGTAATCTCGTGACAATGT  
ACCGGAAAAATCCATCGTCGGGATTACCACTTTCCGTCTTGATCTCCAGGCCGGCGCGATCGGTAATATCACAGTTGCTCGATCCGAATCCTAATAAAAGGATGAGCATCGAAGCGCTGATGGAATCTGCCTG  
GTTCAAGAAATCTACGCCGGCGAAAAAATCTGAACATGCGAGTTCTGTTTGATTGACATGGAATCAATGAAAGTTTGTGAATATGGTTCAGCGCCGCTAACCATGAATGCATTGACATAATATCGATGTCTG  
TCTGGTGTGGACCTGTCGGGGCTTTCTTCGAAGCAGCAGCGAATAAGAGGGAGAAGAGGTTCTACCTGAGGGCATCAGCAGAGATAACTGTGGAGAAGATGAGAGAGGTTGGTGAGAAATTGGGATACGG  
TGTGTAGAGAGGGGAAGGTTGGAAGTATAAGGAGGGAGCGGGGAAGGGTGGTCTGTTGGTTCGAAGTTTCAGAAAGTTGCTCCATCAATTGTTACTAGTGGAGGTGACAGGTGGTAGACGGAGGAGAATTTGAGG  
AGTTGAAATGGGAAATTGTGAAAGCTGGGCTTGAAGATATAGTTGTTTCATGGGAGGGTAGTGGGATGTAG

>**VvCIPK30**.V.vinifera v2.1|VIT\_209s0070g00160.1

ATGGCTAAGATTAGCCAAGACAAGTTAGACTACTCAAGCCTGCTCCATGGCAAATACGAGCTAGGCCGCCTGCTTGGCCATGGCACCTTTGCAAAGGTGTACCATGCCAGGAACCTTAAGAAATGGGGAGAGT  
GTAGCCATGAAAGTGGTTGCGAAAAGACAAGGTGATAAAAGGTGGGGATGATGGAGCAAATGAAGCGTGAGATATCGGTGATGAAGAAGGTGAGCCACCCCAACATCGTCCAGCTCCATGAAGTCATGGCAA  
GCAAGTCCAAGATATACCTGGCCATGGAATATGTTCTGTGGGGGTGAGCTCTTTTCCAAGATTGCCAAAGGCAGACTGCGGGAGGATGCAGCCAGGTCTTATTTCCAACAATTGATTTAGCCGTGGAGTTCTG  
CCACAGCCGCGGGGTTTTACCCGGGACTTGAAGCCTGAGAACCTCCTCCTGGATGAACAGGGGAACCTCAAGGTCACTGATTTTGGGCTGTGCGCGCTGTCGGATCACTTGAAGCAGGATGGTTTGTCTGCAC  
ACCGCCTGTGGGACTCCGGCCTATGTTGCGCCGGAGGTGATTGCGAAGAGGGGTACGATGGCGCAAAGGCAGATATATGGTCTTGTGGGGTGATACTGTTCTGTGCTTATGGCTGGATTTTTGCCCTTCCAGG  
ATGACAACCTTATTGCTATGACAAAAGATCTACAGAGGGGACTTCAAGTGTCGGCTTGGTTCTACCTGAAGCGCGCAGAGATTGTTGTAGGCTGCTTGATCCAAACCCCAATCCAGAATACCACTTTC  
CAAGCTCAAGGAAACATCCTGGTTTAAAGAAAACAAAGCCTAAAAATGTGCAGACTACTGCTAGTGGTGTGGCCGTCGAAGAGGAAATGGAAGTGAAAGAGAAGGTGCCTGAGGCTCTTAACGCCTTTTACA  
TAATCTCGTTATCGGAGGGGTTTCGATCTGTCCCTCTGTTTGAGGAGAAGAAGAAGGAGGAGGAAGAGGAGATGAGGTTTGGCAGCTTAAAAAGTCGATGAGCGACGTGGTATTGAAGCTAGAGGAGCTG  
ACCAAGCCTGGGATGTTTCCGATGACTCCAGCTCTCGGAGGAGACAGTGTGGATCAGTACAATCAGAGTTGCGGCAAGGAGTTGAGACCAGCAGTGGAGGGCATAGGCTGGACAGCAACCCAAAAATTCGGC  
AGTTGCTTGA

>**VvCIPK31**.V.vinifera v2.1|VIT\_211s0016g00200.1

ATGGCGGATTTCGGGTAAAGATTCTGTGCCCGTCTTTGCTTACGGTAAATACGAGCTGGGACGGCTTCTGGGTACGGGCACCTTCGCCAAGGTGTATCATGCCCCGAACTTGCAGACAGGGGAAGAGTGTAGCG  
ATGAAAGTGGTGGGTAAAGGATAAGGTGATAAAAGTGGGGATGACGGAGCAGGTGAAGAGGGAGATATCAGTTATGAAGATGGTACAGCATCCCAATATTGTTGAGCTTACGAAGTCATGGCCAGCAAGTC  
CAAGATCTACTTCGCCATGGAGCTCGTCCGCGCGCGGAGCTTTTCTCCAAGATCTCCAAAGGGCGGTTGAGGGAGGACGTTGTCTAGAGTGTACTTCCAGCAGCTGATCTCGGCGGTGGACTTTTGCCACAGC  
CGCGGAGTCTAACCCCGGATCTGAAGCCGGAGAATCTACTCTCGACGAGTCTGGCAACTTGAAAGTACCCGATTTTGGGCTGAGCGCGCTGTACAGAGCACTTGAAGCAAGATGGGCTTTTGCACACGACA  
TGTGGGACTCCAGCCTACGTCGCGCCCCGAGGTGATTGGAAGAATGGGTATGATGGGGCAAAGGCCGATCTGTGGTCTGTGCGGTGTGATTCTGTACGTTCTTCTCGCCGATTCTTGGCCGTTTCAGGACGACA  
ACATTGTGGCCATGTATAGGAAGATCTACAGAGGAGACTTAAAGTGTCCGCTTGGTTTTCACCCGAATCTCGCAGACTCGTCACGAAACTCCTCGATCCAACCCCAACACTCGAATACCATAGCCAAGAT  
CGTGGAAATCCTCCTGGTTCAAAAAGTCGGTGCCCAAAACGATACTAACCAAAAGAGGAACAAGAATTCGAGTCAATCAATTGCGGAAAAGCAAAGCAGCCGGAGACCCTGAACGCGTTCCACATCATCTCCCT  
ATCGGAGGGGTTTCGATCTGTACCTTTGTTTGAAGAGAAGAAGAGAGAGCAAAAAGGAGGAATGAGGTTTCGCGACGACGAGCCAGCGAGCAGCGTGATATCGAACTGGAGGAGGTAGCGAAGGCAGGG  
AAATTCAGCGTGAAGAAGAGCGAAACGATAGTGAGGCTGCAGGGGCAGGAAAAGAGGAAAGAAAAGGGAATTAGCGATAGGAGCGGAGATATTCGCAGTGGCGCCGTCTTCTCGTGGTGGAGGTGAAGA  
AGCACCATGGTGATAGCTGGAGTACGACCAGTTCTGCAACAAGGAGCTCCGCGCGGCTCTCAAGGACATAGTTTGGACGTCCACCCAGCCTGA

>**VvCIPK32**.V.vinifera v2.1|VIT\_204s0008g05770.1

ATGGAAGAGGTGAGGATGTCTGTTTGGGAAGTATGAAACGGGGAGGTTGCTCGGGAAAGGGACCTTCGCCAAGGTCTACTATGCTAAGCATATGGTGTCCGGGGAGAGCGTTGCGATCAAAGTAATCAA  
CAAAGACTATGTGAAAAAGGAAGGAATGATGGAGCAAATCAAACGAGAAAATATCGGTGATGCGATTAGTACGACACCCCAATATCGTTGAGCTCAAAGAAGTGATGGCCACAAAGACCAAGATCTTCTTTG  
TGATGGAGTACGTTTCGCGCGCGGAGCTATTCGCCAAGGTTCGCCAAGGGGAAACTGAAAGAAGATCAGTCCAGAAAGTACTTTCAGCAGCTCATCAGCGCTATCGATTCTGTACAGCCGTGGCGTCTCTC  
ACCGTGATCTCAAGCCGGAATAATCTTCTCCTGGATGAAAACGAAGACCTTAAAGTGTCTGATTTTGGGTTGTGCGCGCTTGCCGGAGCAGCTCCGGAACGATGGACTTCTTACACACAGTGTGGGACTCCGGC  
ATATGTGCGCGCGGAGGTTTTGAGGAAGAAAAGGGTATGATGGGGCCAAAGCAGATATGTGGTCTTGTGGGTTTACCTCTTTGTACTTCTTGCAGGGTTTCTACCTTTTCAAGAAGAGAATCTGATGAAGATG  
TATAGGAAGGTTTTCAAGGCTGAATATCAGTTCCACCATGGTTTTCATCAGAAGCCAAAAGACTAATATCAAAGCTCTGGTAGCTGACCCTCAAAGACGGATAACAATACCCGGAATAATGCGAGTTCCCT  
GGTTCCGAAAAGGGTTTTCAAGGCCTGTTGCTTTTTCAATAGAAGAACCATTCCCGGACAAGCCTGAGGACAGTGATACACTAAAGCTTGAAGCTGCAAAGAGTACCAATTCCCCGTCCCCGGCCTTCTTCAA  
TGCATTTGAGTTCAATTCCTCGATGTATCGGGCTTCGACTTATCAAGCTTGTGTTGAAAATCAGAAGAAGGTGGATCAATGTTTACCTCCAAGTGCTCGGCGGTGCGATCATGGCCAAAATTGAGCTGGTGG  
CCAAGGGTTTGAAGTTTGGGTTGCAAAGGTGAAGGACTTCAAGTTGAAGCTTCAAGGGCAATCAGAGGGCCGGAAGGGAGGTTATCGTTGACGGCGGAGGTGTTTCAGAGTGGCGCTGAAGTCGCCATC  
GTGAGTCTTGAAGTCGGCTGGCGATACGTTGGAGTATGCCAAATCTGTGAGGAAGACGTTAGGCCTGCATTGAAAGACATTGTTTGGACATGGCAAGGTGACAATCACAATGGTAATGTTAGCAACAAT  
ATTGTTGAATGTGAAATTA

>**VvCIPK33**.V.vinifera v2.1|VIT\_209s0070g00140.1

ATGGAGGGGCAGAAAGAACCAAGTTGTTGATGAAGCAAGAAGCATATTGTTTAAAGAAATACGAGATGGGAAGGCTTCTTGGGCAGGGCACCTTCGCAAAGGTGTACCACGCGAAGAGGCTTGGGAGTGGGGA  
CAGCGTTGCCATCAAGGTGATCAACAAGGACCACGTGAAGAAACAGGGCATGATGGAGCAGATCCAGCGCAAAATCTCTGTTATGCGCCTTGTTCGCCACCCCAATGTGGTGGAAATTGAAGGAAGTGATGGC  
CACAAAGACCAAAATCTTCTTCGCCATGGAGTTTCGTAAAGGGTGGTGAATTGTTTCGCAAAAGTGACCAAGGGAAGGCTCAAAGAGGATTCCGGCTAGAAAAATACTTCCAGCAGCTTGTACAGCGCCATCGATT



TTGCCACAGCAGAGGCGTTTTCCACC GCGATCTCAAACCCGAAAAC TTGCTCCTCGATGAAAACGAGA ACTTGAAAGTCTCCGATTTTGGGCTGTCGTCGTTGCCGGAGCAGCTCAGAAATGATGGATTGCTG  
CACACACAGTGTGGGACGCCAGCATACGTGGCGCCGAGGTGTGAGGAAGCGAGGCTACGACGGAGCCAAGGCCGATACATGGTCTTGTGGGGTTATTCTCTATGTTCTGCTTTGCGGCTTTCTTCCATTTC  
GAGCAGAGAATGTTATGAAGATGTACACCAAGGTTTTCAAGCGCAGAGTTCGAGTTTCTCCATGGGTTTCGACCCAAGCAAAAGCGGCTGATATCGAAGCTCCTCGTTGCTGATCCCGAGAAACGAATCACCA  
TTTCTGCGATCATGGAGGATCCTTGGTTTTCAGAAAAGGTTTTCAGGAAGCCTATTGCCTTTTCAATTGAAGAACAAGAGAACAACGAGGAGTGGCAAGGGTGTAGAGGGGAGGTGGAATGGTGAGAACAAAG  
TCCTCACCACCTTTCTACAACGCCTTCGAGTTCATCTCCTCAATGTATCGGGCTTCGACTTGTCCAGCTTGTTCCTGAGCAAGAGGAAGTCGGGCTCCATGTTACCTCCAAGTGTCCGCCTCAACCATCATG  
GCCAAGCTCGAATCACTGGCTAAGACGCTCAATTTCAAGATGGTGAACGTGAAGGAGTTCAAGGTGAAAAATGCAGGGGCTAGTGGATGGGCGGAAGGGGAAGTTGTCGGTAACGGCCGAGGTGTTTCGAGGT  
GGCGCCGCAAGTGGCCTTGGTCCAATTCTCCAAGTCCGCGGTGACACCCTGGAGTACACCAAGTTTTGTGAGGAGGAGGCCAGGCCTGCTCTCAAAGACATTGTTTGGAGTTGGCAAGGTGAAAAATGAGTG  
CATAAATGATAATTTGTTCTCTGTTGTATTTTTGGCGAGTCTATGACATGTGAGGAATGGTAG

>VvCIPK34.V.vinifera v2.1|VIT\_208s0058g01040.1

ATGGAATAATGGGAGTATCCTGATGCAACGGTATGAATTAGGGAAATTATTAGGTCAAGGCACCTTTGCCAAGGTCCATCATGCCAGGAACCTTAAAACTGGCACCAGTGTTGCCATTAAGATAATTGAT  
AAAGAGAAGATTTTGAAGGTTGGGATGGTGGATCAGATTAAGCGAGAGATTTCTGTAATGAGACTGGTTAGACACCCAAATGTGGTAGAGCTTTATGAGGTTATGGCCAGCAAAACGAAGATTACTTTGTCTC  
ATGGAATATGCTAAAGGAGGGGAGCTCTTCAACAAGGTAGCCAAAGGAAAAGCTCAAGGAGGATGTTGCAAGGAAATATTTTCAACAGCTGATCAGTGCGGTTGATTTCTGTACAGTAGAGGTGTTTATCAT  
CGGGATTTAAAGCCAGAAAACCTTCTACTGGATGAGAATGAAAATCTAAAAGTTTCAGACTTTGGACTGAGTGCCCTTGTGAATCTAAGCACCAGATGGGTTGCTTCACACAACCTGTGGAACCCCGCCT  
ATGTTGCTCCAGAGGTGATCAATAGGAAAAGGCTATGATGGAGCCAAAGCTGATATATGGTCAATGTGGGGTGGTCTTATTCGTTTTGTTGGCTGGCTATCTCCCATTTTCATGATTCAAATCTGATGGAGTTGTAT  
AGGAAGATTGGTAAGGCAGAATATAGATTCCCTAACTGGTTCCCTTCGGAAGTACGAAGGTTGCTGTCAAAGATCTTGGATCCAAACCCAAGACTAGGATTCCATTACCAAAATAATGGAATAATTTCTTG  
TTCCAAAAGGGTCTTGATCTGCTGTCCCTGAGGATCACTGAAACAGGAGAGAAAAGAGCCAGCTGATCTCGAGGTTGAGGCTGTATTTGGTTCTAATGAGAGTGCAGCACCCTGCTGAGGCAAAAGCAAGAATTG  
GCGACGCTTAGTAACCTGAATGCGTTTGATATCATTTTCTTTTCAGCAGGGTTTGACTTGTCTGGTTTGTTCGAGGAAAAATAAGCAAAAGAAAGAAAGTGCAGATTACATCTAGGCAGCCAGCCTCAGCCATCA  
TCTCTAAACTGGAGGACATTGCTAAGCGTTTGATGCTGAAGGTGAAGAAAGAGGATGGTGGGTTGTTGAAAATGGAAGGTTCAAAGGAAGGCAGGAAAGGCGTCTGTCCATTGATGCAGAGATCTTTGAG  
GTGACTCCATCTTTTCATTTGGTGGAGGTGAAGAAAGTCCAGTGGGGACACGTTGGAGTACCAGAAAAATAGTGAACAGGAGATAAGACCAGCTCTCAAGGACATTGTGTGGGCATGGCAAGGTGAGCAGCA  
GCAGCAGCAACAACAAGCAAGACCAATGCCCTATTGCAGCCCATCTCACCTCCAGCTTCATAA

>VvCIPK35.V.vinifera v2.1|VIT\_216s0022g00350.1

ATGGATGATCTGCCTCTATGGTTAGATGTGAATGAAGATCCAAGTAATGATTATTTGTGGAAAACCTTTGGCATCATCTTAATCAACTGTGAGAAAGAAATGGTGCACATGAGAGACATATTCCTCTTTTAAAC  
AGATTCGTCAAAGCTTTTTTCTCTGAGGGTGTGGCTTCACCTCGAGAGCATTCTCTGAAAAGGTAGATTGGACAAGAAGTACAGGAACCTTAAAACTGGCACTAGTGTTGCCATTAAGATAATTGATAAAGAG  
AAGAATTTGAAGGTTGGGATGGTGGATCAGATTAAGCGAGAGATTTCTGTAATGAGACTGGTTAGACACCCAAATGTGGTAAAGCTTTATGAGGTTATGGCCAGCAAAATGAAGATTACTTTGTCTATGGAA  
TATGCTAAAGGAAGGATCTTCAACAAGGTAGCCAAAGGAAAAGTCAAGGAGGATGTTGTAAGGAAATATTTTCAACAGCTGATCAGTGCAAGTTGATTCTATCACAATAGAGGTGTTATCATCGGGAT  
TGA

>VvCIPK36.V.vinifera v2.1|VIT\_210s0003g01410.1

ATGGAGGAATTGAGTCCATGTTTCAAGCATGTGGACCAGCAATCCCCATGGAGGCCACCCACCACTACGTGCCTCTCTCTCCGTACGAGATGGGGAGAATGCTTGGGCAAGGGGACTTTTGCCAAGGTTTAC  
CATGCTCGGAACCTCAAGTCCGTCAGAGTGTGGCTTGGCCATAAAGATGATTGACAAAGAGAAAGGTGTTGAAGGTGGGGTTGATAGATCAAAATCAAGAGGGAGATCTCGGTGATGCGCCTTGTTCGACACCCTAAT  
GTTGTTCAACTCTATGAGGTCTATGGCGAGCAAGACCAAGATTTATTTTGTCTATGGAGTATGTCAAAGGTGGAGAGCTGTTCAACAAGGTGGCGAAAGGCCAACTCAAGGAAGACGCGGCTCGCAAGTATTTTC  
CAGCAATTGATTGGAGCTGTTGACTTCTGCCATAGCCGAGGAGTCTACCACCGCGACCTCAAGCCGGAGAATCTCCTCCTTGACGAGAATGGAGACCTTAAAGTAACCGATTTTGGCTTGAGTGCCTGTGGG  
ACTCAAGGAGGCATGATGGCCTCTCCACACTACTTGTGGAACCTCCAGCTTATGTGGCTCCGGAGGTCTCAACAAGAAGGGCTATGATGGAGCCAAGGCAGACATGTGGTCAATGTGGCGTCACTTCTCTCGT  
TCTCATGGCTGGTTTTCTCCCTTTCCATGACCCTAACTCATGGAAAATGTACAGGAAGATCAGCAGAGGTGAATTCAGGTGCCCAATGGTTCCCACTGGAGGTCCGGAAGCTTCTTTCAAAATCTCGACC  
CCAGCCCCAGCACTAGAATAAAGTGTGGCCAAGCTCATGGACAACCTTGGTTTCAAGAAGGGATTCAAACCGATTGTAGCCCCACAACCCAATCGAAATGATTTCGATGAGCGATGTCCGTGCTGTATTTGCCA  
CACATCCAGAAGGAACCTTCTGAGGAGGAAGCCGAGGAAACAACAAGCAGCATGAAGCCAACCTGTTTGAATGCCTTCGATATCATCTCTCTCTCACCCGGGTTTGTCTGTCAAGTCTGTTTGAGAAAGATAC  
CAATCATAGGCCAGACGCTCGGTTCAACCAAAACAGCCTGCATCAACCATTTGATCCAAACTGGAAGAAATAGCAGAAATGGAGAGATTAAAGGTTAAGAAAAAGGATGGGACGGTGAAAGTTGCAAGGCA  
GCAAGGAAGGGAGAAAGGGTCAGCTTGCTATAGATGCTGAAATTTTCGAGGTACGCCTTCACTTTTCGTGGTGGAGGTGAAGAAAACGGCAGGTGACACCTTGGAGTATAAGAAAGTTCTGTAAACCAAGATT  
TGAAGCCTTCACTCAAGGATATCGTATGGACTTGGCAAGGAAGTGAGCAGCAGGAGCAACAGCCACAACCAATAG

>VvCIPK37.V.vinifera v2.1|VIT\_213s0067g02480.1

ATGGAATAAAGGGGAATGTGCTGATGCAAAGGTATGATGTGCGGAGATTGCTAGGCCAAGGAAAACCTTTGCTAAGGTTTACTATGGAAGGGATCTAAAACTGGCCAGAGTGTAGCCATTAAGGTGATCGA  
CAAAGAAAAGATTTTTAAAGTGGGGCTAATTGATCAGACCAAGAGGGAGATATCTGTTATGAAGCTTGTAACCAACCCCTAATGTCAATTCAGTTTTACGAGGTGATGGCCACCAAAACCAAGATTTACTTTGTT  
ATGGAATATGCCAAAGGTGGTGAGCTGTTTAAACAAGGTAGCCAAAGGAAGGCTCATGGGAGATTTTGCAAGGAATTTTCAACAGTTGATCAGTGCCGTTGACTTTTGCCACAGCAGAGGTGTTTATCACC  
GGGATTTGAAACCAGAAAACCTATTGCTGGACGAGAATGGAGTTCTGAAGGTGACAGATTTTGGGTTGAGTGCCCTTGCAAGATCGAAGCATCAAGATGGATTACTCCACACAACCTGTGGAACCCCTGCTT  
ATGTAGCGCCAGAAGTGATAAATAGAAAAGGGTATGATGGGGCCAAAGCTGACATCTGGTCTTGTGGGGTGATCTTATTTGTTCTTCTGGCTGGGTATCTCCATTCCATGATTCAAATCTAATGGAGATGTA  
TAGGAAGATAGGCAAGGCAGATTATAAATGCCCAATTGGTTCCCATCTGAAGTGCGCAGGTTGTCTGCAAAAAATCCTTGACCCAAACCCCTAATACTAGGATTTCCATTGCAAAAAATAATGGTAAATCCCTGG  
TTTAGGAGAGGGTTTATCCCCAAGCCTTTGAAAACCTAAAACAGAACTCAAGGATTTAGATCCACTGGCAGCAGATACAGTTTTTGCCCTTGTGAGAATAACAGTGCTGCTGCCGAGAGATGAAAGAGTTG  
TCGAAACCTACCCAGCCTACCAATTGAATGCATTTGATATCATCTCTCTTCTACGGGGTTGACTTGTCTGGTTTGTGTTGCAACCAATGACCAAAAGAAAGAAAGTACAATTTACATCCAGCAGCCGCCAC  
AGCTATCATATCTAAACTGGAGGAGATTGCTAGGCGCCTAAGACTGAAAATTAAGAAAGAGGATGGAGGATTGTTGAAATTTGGAGGGATCAGTGGAAGGTAGAAAGGGGCCATTGTCCATTGATGCTGAAA  
TATTTGAGTTTACTTCGTCTTTTCATTTGGTGGAAATGAAGAAAGTCCAGTGGTGATACTTTGGAATATCAGAAGATACTGAGACAGGAGATAAGGCCAGCACTCAAGGACATTGTTTGGGCTTGGCAAGGTGA  
GCAGCAACAGCAGCAGCAACAACAACAACAAGAACCATATCAAGAACTGCAGGTTTCATTCTTCTTGA

>VvCIPK38.V.vinifera v2.1|VIT\_206s0004g07830.1

ATGGAGAGTAAAGGGGCTGTGTTGATGAACAGATATGAATTAGGAAGATTGCTAGGGCAAGGTACCTTTGCTAAGGTTTACTATGCCAGGAATCTTAAAACTGGCCAGAGTGTGGCCATTAAAGTGATAGAC  
AAAGAGAAGGTTGTGAAGGTAGGGCTCAAAGATCAGATCAAGCGAGAAATATCTGTTATGAAACTGGCTAGACACCCTAATGTTTTGCAGCTTTATGAGGTTATGGCCACCAAAAGTAAGATCTACTTTGTT  
ATGGAATATGCTAAAGGTGGTGAGCTCTTAAAGAAGGTGGCTAAAGGGAAGCTAAAGGAGGAAGTTGCGTGGAATATTTAGGCAGCTGATTGATGCTGTTGATTCTGCCATAGCAGGGGAGTTTATCAC  
CGTGATCTGAAACCGGAAAACTTATTGTTGGATGAGAATGATAACCTGAAGGTCTCTGATTTTGGATTAAGTGCCATGGCTGAATGCAAGCATCAAGATGGGCTACTCCACACCCTTGTGGGACTCCTACCT  
ATGTTGCTCCTGAAGTGATCAACAAAAAGGCTATGACGGGGCCAAAGCTGACATTTGGTCTTGTGGGGTGGTCTTATTGTCTCTACTGGCGGGTTATCTCCCATTTTCATGATTCAAATTTGATTGAAATGTAT  
AGGAAGATTAGTAAGGCAGAGTTTAAAGTGCCTAATTTGTTCTCACCAGATGTACGCAGGTTGCTTCAAAGATATTGGATCCAAATCCCAATACTCGAATTTCCATTGGCAAAATCAAGGAAAGTTCTTGGT  
TCAGAAAGAGGATTGAAATCCAAACAGATAAAATCTGAAACAGGAAGCAAGGACATGGCTCCTTTGGATACAGATGCAGCTTCGGGTCCCTGCAAAAAGTAATGGTATGGCTTCTGAAGCAAAAGCAAGATT  
GCCAAACCTACAAACCTGAATGCTTTCGATATCATCTCTATTTCTGCTGGTTTTGATCTGTCTGGCTTGTTCGAGGAACCTTGTCAAAAAGAAAAAGGCAATATTTACTTTTCAGAAAACCTGCTGCTGTCATCAT  
CTCTCGACTGGAAGAAATTGCCAAGCATCTGAGGCTGAAAGTGATGAAGAAGGATGCAGGTTTCATGAAATTTGAGGGCCTGAAGGAAGGTAAGAAAGGAATCTTGTCTATTGATGCAGAGATTTTGTAGGT  
GACACCATCTTTTCATTTGGTGGAAAGTAAAGAAGTCTAATGGAGATACGTTGGAATATCAGAAGCTACTGAAAGAAGATATAAGACCTGCTCTCCAAGATATCGTTTGGACTTGGCAAGGTGAGGAGCAGCA  
GCAACAACAACAGCTTTCCTGA

>VvCIPK39.V.vinifera v2.1|VIT\_210s0003g04020.6

ATGGCGTCAAGTCAAGTACTGGCAGGACACGTGTGGGGAAGTATGAATTGGGTGCAACCTAGGGGAAGGGACGTTTGCAAAGGTCAAGTTTGCAGGAATGTGGAGACTGGGGAGAATGTTGCTATTAA  
GATTCTCGACAAAGAAAAAGGTTCTTAAAGCATAAGATGATCGGTGAGATTAAAGGGGAAATTTCAACCATGAACTGATCAGACATCCAAATGTCAATTCGAATGCATGAGGTGATGGCTAGCAAGACAAAGAT  
ATACATTGTTTTGGAATTTGTGACTGGTGGTGAACTTTTTGACAAAATTTGCTAGTAAAGGAAGGTTGAAAGAAGATGAAGCAAGAAAGTATTTCCAACAGCTAATTAACGCTGTGGATTACTGCCATAGTAGA  
TGTGTTTTCCATAGAGACCTAAAGCCGGAGAACTTATTGCTTGATGCTAATGGAGTTCTTAAAGTTTCAGATTTTGATTGAGTGCACACTCAACAAGTTTCGAGAAGATGGGTTACTTTCACACAACATGTGG  
AACTCCAAACTATGTTGCTCCAGAGGTGATCAATAACAAAGGCTATGATGGAGCTAAGGCAGACCTATGGTCATGTGGGGTAATCTTATTTGTTCTTATGGCTGGCTATTTGCCTTTTGAAGAATCGAACCTCA  
TGGCTTTGTATAAAAAAGATATTCAAGGCCGACTTACGTTTCCCTCCCTGGTTATCCTCAAGTGCAAAGAAGCTAATTAAGAAGTCTTGGACCTTAACCCGGAGACGAGGATTACAATTGCTGAAGTCATTGA  
GAATGAGTGGTTTAAAGAGGGATATAAGCCACCTAGTTTCGAACAAGCAGATGTTAGTCTTGATGATGTGGACGCCATCTTTGATGAATCAGGGGACTCTCAAAACCTTGTGTGGAGAGGGCGTGAAGAGCG  
ACCTACGACGCTGTCATTTTGAATGCTTTTGAACCTCATCTCTACATCTCAGGGTCTCAACCTCGGTACTCTCTTTGAAAAGCCAATGGGCCTTGTAAACGGGAGACAAGATTTCACATCGAAGCGTCTCGCCA  
ATGAGATTATCTCAAAAATTGAGGAACTGCTATGCCTTTGGGGTTTGATGTAAAGAAAAATAAAGTTCAAGATGAAACTTCAAGGGGAGAAAACTGGACGCAAGGGTCATTTATCCATTGCAACAGAGATTT  
TTGAGGTGGCCCTTCGCTATACATGGTTGAGCTTCGAAAATCTGGGGGAGATACTTTGGAATTTACAAGTTCTACAAGAACCTCTCAACTGGGTGAAAGATATTGTTTGGAAATCAGGAGATGAATCAAA  
GGAGGAAGTGAATAATGGTTAG

>VvCIPK40.V.vinifera v2.1|VIT\_205s0020g00830.1

ATGGAGAGATTATACAATTGAAGGGGGGAGGGTGGTGGGATAAAGAGGGAGATTGCCACCTTGAAACTCCTCAAAACATCCAAACGTGGTCAGATTACATGAGGTCTTGGCAAGCAAAACCAAGATTTACAT  
GGTCTTTGAGTATGTGACTGGCGGCGAATTGTTTGACAGAATTGCATCCAATGGGAACTTTTCAAGCTGAAGGCAGGAACTCTTCCAACAGTTGATTGATGCTGTGAGCTATTGCCACAACAAAGGTGTT  
TTCCATAGGGGATCTCAAGCTAGAGAATGTTCTTGTGATTCAAAGGAAACATAAAGATCTCTGATTTTGGCCTCAGTGCCTTACCACAGCATTTAGGGATGATGGGTTGTTGCATACAACCTGTGGAAGTCC  
AAACTACGTTGCACCAAGAGATTCTTGCAAAATAGAGGTTACGACGGTTCAACTTCTGACATTTGGTCATGTGGTGTCTCTTATACGTGATTCTTACAGGGTATCTCCCTTTTGTGATAGAAAATCTTGCTGTTCT  
CTATCAGAAGATTTCGAAGGGGATGCTCAGATGCCAAATGGCTGTCTATCAGGGTGCCAAGAACATTATAAAGAGAATTCTTGACCCCAACCTGAAACCCGAATAACAATGGCAGGGATCAAAAGCATGTA  
ATGGTTCAAGCAACAGTATACACCAGCTTATCCCGAAGAGGAAGAAGAAGATATTCATGTGGATGATGAAGCTTTCTCAATATATGAGCCAATGGAAGCAAAAGAAGAGTCCAGGCTCACCCAACCTCATCAA  
TGCCTTCCAGCTGATTGGAATGCTCTCATGCCTTGATCTCTCTGGTTCTTTGAGAAAGAGGATGTGTGAGAGAGGAAAATCAGATTTACCTCAAAATCATTGCCCAAAAGATTACTTGAGAAGATTGAGGATA  
TTGTCACAGAGATGGGATTTTCGAGTAGAGAAGAAAAATGGAAGGCTTAAAGTGATGCAAGAGCATAAGTGTCAGAAAAGCTTTGGGAGTCTTTCCGTGGCAGCAGAGGTGTTTGAATAAGCCCATCCTTGT  
ATGTAGTTGAGTTGAGAAAATCTTATGGGGATTCTCTGTTTATAGACAGTTGTGTAAAAAGCTATCAAGTGATCTGGGTGTTCTTACCAGCCAAGAGCTATTGAAAAGTTTGA

>VvCIPK41-1.V.vinifera v2.1|VIT\_218s0001g07980.1

ATGGTGGCGGTGCGGAAGGTTGGCAAGTATGAGGTGGGGAGGACGATCGGAGAAGGGACCTTCGCTAAGGTAAAGTTTCGCGCAGAACACGGAGACCGGTGAGAGTGTGGCCATGAAAGTGCTCGATCGCA  
GCACCATCATCAAGCACAAGATGACCGACCAGATTAAGAGGGAGATATCTATAATGAAGCTTGTAGACATCCATATGTTGTTTCGTCTTCATGAGGTTCTAGCAAGCCGTACAAAAATATATATAATCTTGGA  
GTTTCATCACAGGTGGCGAGTTGTTTGATAAAAATAGTTTACCATTGGCCGACTAAGTGAAAAATGAATCTAGAAGTTACTTCCAACAGCTCATTGACGGTGTGGATTATTGCCACAGTAAGGGAGTCTACCACAGA  
GACTTAAAGCCTGAAAAACCTTCTACTAGATTCCCAAGGAAATCTAAAGATTTCAGATTTTGGTCTCAGTGCGTTGCTTGCCTGCGCCGGGAGTTAGCCTCTTAAGACAACCTTGTGGTACTCTTAACATATGTAGCACC  
AGAGGTACTCAGTCACAAGGGTTATGATGGTGCTGTAGCAGATGTCTGGTCTTGTGGTGTCTATCCTTTATGTTCTGATGGCTGGATATCTCCCGTTTGATGAGCTTGATTAAACCACTCTGTACAGTAAGATCG  
AGAGAGCAGAAATTTTCATGCCCATCCTGGTTTCCAGTGAGGAGCAAAATCCTTGATTATAGAATTTAGACCCAAATCCTGAAACTCGCATTCGAATTGAACAGATCAGGAGCGATGAGTGGTTTAGAAAGG  
GGTATGTTCCAGTCCGACTTCTTGAATATGAAGATGTTAACCTGGATGATGTAAACGCTGTGTTTGATGATCCTGAGGAACAACATGCTAATGATCAACATGGAATGAGGACATGGGTCTCTGATTCTTAA  
TGCATTGACCAATCAATCTTTCTCAGGGCCTAAACCTTTACGCTCTGTTTGAACGGGGAGAGGGCCCTGTAAGCATCAAAACAGTTTCGTTTACAGAAAACCAAGAGTTGTTCTATCAAGCATGGAA  
GTTGTTGCACAATCCATGGGTTTCAAGACACATATTCGCAATTATAAGATGAGGGTGGAAGGCATTTTCAGCCAATAAGATGGAACATTTCTCAGTCATGTTGGAATTTTGAAGTTGCTCCACATTTATTAT  
GGTAGACATTCAAGAAAGCAGCTGGAGATGCTGGTGAATACCAGAAGTTTACAAGAACTTCTGCAGCAATCTGGAGGATATCATCTGGAAAACCACTCAATGAATCAAGCAATCAAGGATCACCAAGACGA  
AGAGTAAAAAGGGTTGA

>VvCIPK41-2.V.vinifera v2.1|VIT\_218s0001g07980.2

ATGGTGGCGGTGCGGAAGGTTGGCAAGTATGAGGTGGGGAGGACGATCGGAGAAGGGACCTTCGCTAAGGTAAAGTTTCGCGCAGAACACGGAGACCGGTGAGAGTGTGGCCATGAAAGTGCTCGATCGCA  
GCACCATCATCAAGCACAAGATGACCGACCAGATTAAGAGGGAGATATCTATAATGAAGCTTGTAGACATCCATATGTTGTTTCGTCTTCATGAGGTTCTAGCAAGCCGTACAAAAATATATATAATCTTGGA  
GTTTCATCACAGGTGGCGAGTTGTTTGATAAAAATAGTTTACCATTGGCCGACTAAGTGAAAAATGAATCTAGAAGTTACTTCCAACAGCTCATTGACGGTGTGGATTATTGCCACAGTAAGGGAGTCTACCACAGA  
GACTTAAAGCCTGAAAAACCTTCTACTAGATTCCCAAGGAAATCTAAAGATTTCAGATTTTGGTCTCAGTGCGTTGCTTGCCTGCGCCGGGAGTTAGCCTCCTTAAGACAACCTTGTGGTACTCCTAATATGTAGCACC  
AGAGGTACTCAGTCACAAGGGTTATGATGGTGCTGTAGCAGATGTCTGGTCTTGTGGTGTCTATCCTTTATGTTCTGATGGCTGGATATCTCCCGTTTGATGAGCTTGATTAAACCACTCTGTACAGTAAGATCG

AGAGAGCAGAAATTTTCATGCCCATCCTGGTTTCCAGTGGGAGCAAAATCCTTGATTCATAGAATTTTAGACCCAAATCCTGAAACTCGCATTGCAATTGAACAGATCAGGAGCGATGAGTGGTTTAGAAAGG  
GGTATGTTCCAGTCCGACTTCTGAATATGAAGATGTTAACCTGGATGATGTAAACGCTGTGTTTGATGATCCTGAGGAACAACATGCTAATGATCAACATGGAAATGAGGACATGGGTCCTCTGATTCTTAA  
TGCAATTTGACCTAATAATTCTTCTCAGGGCCTAAACCTTTCAGCTCTGTTTGAACGGGGAGAGTACTCCTGGGCTGTTAGGAATGTAAAAAATATCAGATCTGACCAATGA

>VvCIPK41-3.V.vinifera v2.1|VIT\_218s0001g07980.3  
ATGGTGGCGGTGCGGAAGGTTGGCAAGTATGAGGTGGGGAGGACGATCGGAGAAGGGACCTTCGCTAAGGTTAAAGTTTCGCGCAGAACACGGAGACCGGTGAGAGTGTGGCCATGAAAAGTGCTCGATCGCA  
GCACCATCATCAAGCACAAGATGACCGACCAGATTAAGAGGGAGATATCTATAATGAAGCTTGTAGACATCCATATGTTGTTTCGTCTTCATGAGGTTCTAGCAAGCCGTACAAAAATATATATAATCTTGGA  
GTTTCATCACAGGTGGCGAGTTGTTTGATAAAAATAGTTCACCATGGCCGACTAAGTGAAAAATGAATCTAGAAGTTACTTCCAACAGCTCATTGACGGTGTGGATTATTGCCACAGTAAGGGAGTCTACCACAGA  
GACTTAAAGCCTGAAAACCTTCTACTAGATTCCCAAGGAAATCTAAAGATTTTCAGATTTTGGTCTCAGTGCGTTGCCTGCGCCGGGAGTTAGCCTCCTTAAGACAACCTGTGGTACTCCTAACTATGTAGCACC  
AGAGGTACTCAGTCACAAGGGTTATGATGGTGCTGTAGCAGATGTCTGGTCTTGTGGTGTCAATCCTTTATGTTCTGATGGCTGGATATCTCCCGTTTGATGAGCTTGATTAAACCACTCTGTACAGTAAGATCG  
AGAGAGCAGAAATTTTCATGCCCATCCTGGTTTCCAGTGGGAGCAAAATCCTTGATTCATAGAATTTTAGACCCAAATCCTGAAACTCGCATTGCAATTGAACAGATCAGGAGCGATGAGTGGTTTAGAAAGG  
GGTATGTTCCAGTCCGACTTCTGAATATGAAGATGTTAACCTGGATGATGTAAACGCTGTGTTTGATGATCCTGAGGAACAACATGCTAATGATCAACATGGAAATGAGGACATGGGTCCTCTGATTCTTAA  
TGCATTTGACCTAATAATTCTTCTCAGGGCCTAAACCTTTCAGCTCTGTTTGAACGGGGAGAGGGCCCTGTAAAGCATCAAAACGCTTTCGTTTACAGAAAACCAAGAGTTGTTCTATCAAGCATGGAA  
GTTGTTGCACAATCCATGGGTTTCAAGACACATATTCGCAATTATAAGATGAGGGTGGAAAGGCATTTTCAGCCAATAAGATGGAACATTTCTCAGTCATGTTGGAAATTTTGAAGTTGCTCCACATTTATTAT  
GGTAGACATTTCAGAAAGCAGCTGGAGATGCTGGTGAATACCAGAAGGTTAGTTACTCAAAATGTTTCTCTTCAACAACATATCTGA

>VvCIPK41-4.V.vinifera v2.1|VIT\_218s0001g07980.4  
ATGGTGGCGGTGCGGAAGGTTGGCAAGTATGAGGTGGGGAGGACGATCGGAGAAGGGACCTTCGCTAAGGTTAAAGTTTCGCGCAGAACACGGAGACCGGTGAGAGTGTGGCCATGAAAAGTGCTCGATCGCA  
GCACCATCATCAAGCACAAGATGACCGACCAGATTAAGAGGGAGATATCTATAATGAAGCTTGTAGACATCCATATGTTGTTTCGTCTTCATGAGGTTCTAGCAAGCCGTACAAAAATATATATAATCTTGGA  
GTTTCATCACAGGTGGCGAGTTGTTTGATAAAAATAGTTCACCATGGCCGACTAAGTGAAAAATGAATCTAGAAGTTACTTCCAACAGCTCATTGACGGTGTGGATTATTGCCACAGTAAGGGAGTCTACCACAGA  
GACTTAAAGCCTGAAAACCTTCTACTAGATTCCCAAGGAAATCTAAAGATTTTCAGATTTTGGTCTCAGTGCGTTGCCTGCGCCGGGAGTTAGCCTCCTTAAGACAACCTGTGGTACTCCTAACTATGTAGCACC  
AGAGGTACTCAGTCACAAGGGTTATGATGGTGCTGTAGCAGATGTCTGGTCTTGTGGTGTCAATCCTTTATGTTCTGATGGCTGGATATCTCCCGTTTGATGAGCTTGATTAAACCACTCTGTACAGTAAGATCG  
AGAGAGCAGAAATTTTCATGCCCATCCTGGTTTCCAGTGGGAGCAAAATCCTTGATTCATAGAATTTTAGACCCAAATCCTGAAACTCGCATTGCAATTGAACAGATCAGGAGCGATGAGTGGTTTAGAAAGG  
GGTATGTTCCAGTCCGACTTCTGAATATGAAGATGTTAACCTGGATGATGTAAACGCTGTGTTTGATGATCCTGAGGAACAACATGCTAATGATCAACATGGAAATGAGGACATGGGTCCTCTGATTCTTAA  
TGCATTTGACCTAATAATTCTTCTCAGGGCCTAAACCTTTCAGCTCTGTTTGAACGGGGAGAGGTAAGATTTACTTGTATTTTTATTGTATTCCACTCATATATATATATATATATATATATAGATGGATATATAT  
ATATATATCTGACATCTGGTTTAGCAATCCTAACTAA

>VvCIPK41-5.V.vinifera v2.1|VIT\_218s0001g07980.5  
ATGGTGGCGGTGCGGAAGGTTGGCAAGTATGAGGTGGGGAGGACGATCGGAGAAGGGACCTTCGCTAAGGTTAAAGTTTCGCGCAGAACACGGAGACCGGTGAGAGTGTGGCCATGAAAAGTGCTCGATCGCA  
GCACCATCATCAAGCACAAGATGACCGACCAGATTAAGAGGGAGATATCTATAATGAAGCTTGTAGACATCCATATGTTGTTTCGTCTTCATGAGGTTCTAGCAAGCCGTACAAAAATATATATAATCTTGGA  
GTTTCATCACAGGTGGCGAGTTGTTTGATAAAAATAGTTCACCATGGCCGACTAAGTGAAAAATGAATCTAGAAGTTACTTCCAACAGCTCATTGACGGTGTGGATTATTGCCACAGTAAGGGAGTCTACCACAGA  
GACTTAAAGCCTGAAAACCTTCTACTAGATTCCCAAGGAAATCTAAAGATTTTCAGATTTTGGTCTCAGTGCGTTGCCTGCGCCGGGAGTTAGCCTCCTTAAGACAACCTGTGGTACTCCTAACTATGTAGCACC  
AGAGGTACTCAGTCACAAGGGTTATGATGGTGCTGTAGCAGATGTCTGGTCTTGTGGTGTCAATCCTTTATGTTCTGATGGCTGGATATCTCCCGTTTGATGAGCTTGATTAAACCACTCTGTACAGTAAGATCG  
AGAGAGCAGAAATTTTCATGCCCATCCTGGTTTCCAGTGGGAGCAAAATCCTTGATTCATAGAATTTTAGACCCAAATCCTGAAACTCGCATTGCAATTGAACAGATCAGGAGCGATGAGTGGTTTAGAAAGG  
GGTATGTTCCAGTCCGACTTCTGAATATGAAGATGTTAACCTGGATGATGTAAACGCTGTGTTTGATGATCCTGAGGTTGGAACAACATGCTAA

>VvCIPK41-6.V.vinifera v2.1|VIT\_218s0001g07980.6  
ATGGTGGCGGTGCGGAAGGTTGGCAAGTATGAGGTGGGGAGGACGATCGGAGAAGGGACCTTCGCTAAGGTTAAAGTTTCGCGCAGAACACGGAGACCGGTGAGAGTGTGGCCATGAAAAGTGCTCGATCGCA  
GCACCATCATCAAGCACAAGATGACCGACCAGATTAAGAGGGAGATATCTATAATGAAGCTTGTAGACATCCATATGTTGTTTCGTCTTCATGAGGTTCTAGCAAGCCGTACAAAAATATATATAATCTTGGA  
GTTTCATCACAGGTGGCGAGTTGTTTGATAAAAATAGTTCACCATGGCCGACTAAGTGAAAAATGAATCTAGAAGTTACTTCCAACAGCTCATTGACGGTGTGGATTATTGCCACAGTAAGGGAGTCTACCACAGA  
GACTTAAAGCCTGAAAACCTTCTACTAGATTCCCAAGGAAATCTAAAGATTTTCAGATTTTGGTCTCAGTGCGTTGCCTGCGCCGGGAGTTAGCCTCCTTAAGACAACCTGTGGTACTCCTAACTATGTAGCACC  
AGAGGTACTCAGTCACAAGGGTTATGATGGTGCTGTAGCAGATGTCTGGTCTTGTGGTGTCAATCCTTTATGTTCTGATGGCTGGATATCTCCCGTTTGATGAGCTTGATTAAACCACTCTGTACAGTAAGATCG  
AGAGAGCAGAAATTTTCATGCCCATCCTGGTTTCCAGTGGGAGCAAAATCCTTGATTCATAGAATTTTAGACCCAAATCCTGAAACTCGCATTGCAATTGAACAGATCAGGAGCGATGAGTGGTTTAGAAAGG  
GGTATGTTCCAGTCCGACTTCTGAATATGAAGATGTTAACCTGGATGATGTAAACGCTGTGTTTGATGATCCTGAGGTTGGTAAGGTTTCCAAATGTATTTTTTGTCTTAAATTTCTGGTCTATGAAATAC  
TGGGAAACAGTCTGTATTTCATGCTTTTGCCTTTTATTGCCACTGTGA
